# Supplementary material for: Genome-wide identification of leaf abscission associated microRNAs in sugarcane (Saccharum officinarum L.)
Source: PubMed Central journal article supplement (PMC5613641; doi:10.1186/s12864-017-4053-3), 2017-09-25

## Supplementary Information

### **Genome-wide identification of leaf abscission associated microRNAs in sugarcane (*Saccharum officinarum* L.)**

Ming Li<sup>1,†,\*</sup>, Zhaoxu Liang<sup>1,†</sup>, Shanshan He<sup>1</sup>, Yuan Zeng<sup>2</sup>, Yan Jing<sup>1</sup>, Kaichao Wu<sup>1</sup>, Guanyu Wang<sup>2</sup>, Xia Ning<sup>2</sup>, Zhanghong Mo<sup>1</sup>, Lunwang Wang<sup>1</sup> and Song Li<sup>1</sup>, Fang Tan<sup>1,\*</sup>

<sup>1</sup>Sugarcane Research Institute, Guangxi Academy of Agricultural Sciences, Nanning 530007, P.R.China.

<sup>2</sup>Guangxi Academy of Agricultural Sciences, Nanning 530007, P.R.China.

<sup>†</sup>Equal contributors.

\*Correspondence to mingli9606@163.com and tanfang64@163.com.

**Table S1. Raw miRNA reads and normalized miRNA expression in all samples.**

| miRNA           | Raw miRNA reads |        |        |        |        |        | Normalized miRNA expression |        |        |        |        |        |
|-----------------|-----------------|--------|--------|--------|--------|--------|-----------------------------|--------|--------|--------|--------|--------|
|                 | B1              | B2     | Q1     | Q2     | T1     | T2     | B1                          | B2     | Q1     | Q2     | T1     | T2     |
| sof-miR156-3p   | 4               | 6      | 69     | 7      | 12     | 10     | 0.338                       | 0.51   | 5.783  | 0.585  | 1.06   | 0.889  |
| sof-miR156-5p   | 408             | 185    | 15378  | 721    | 871    | 2591   | 34.454                      | 15.712 | 1288.8 | 60.25  | 76.917 | 230.45 |
| sof-miR159-3p   | 36537           | 22568  | 50319  | 19246  | 32150  | 49688  | 3085.4                      | 1916.8 | 4217.1 | 1608.3 | 2839.1 | 4419.3 |
| sof-miR159-5p   | 90              | 175    | 124    | 295    | 5      | 70     | 7.6                         | 14.863 | 10.392 | 24.651 | 0.442  | 6.226  |
| sof-miR160a-3p  | 17              | 3      | 0      | 2      | 2      | 0      | 1.436                       | 0.255  | 0      | 0.167  | 0.177  | 0      |
| sof-miR160a-5p  | 49              | 22     | 31     | 72     | 55     | 85     | 4.138                       | 1.869  | 2.598  | 6.017  | 4.857  | 7.56   |
| sof-miR160b-3p  | 1               | 0      | 0      | 2      | 3      | 3      | 0.084                       | 0      | 0      | 0.167  | 0.265  | 0.267  |
| sof-miR160b-5p  | 32              | 3      | 7      | 1      | 25     | 21     | 2.702                       | 0.255  | 0.587  | 0.084  | 2.208  | 1.868  |
| sof-miR160c-3p  | 2               | 0      | 0      | 3      | 3      | 2      | 0.169                       | 0      | 0      | 0.251  | 0.265  | 0.178  |
| sof-miR160c-5p  | 49              | 21     | 30     | 72     | 59     | 87     | 4.138                       | 1.784  | 2.514  | 6.017  | 5.21   | 7.738  |
| sof-miR160d-5p  | 49              | 22     | 31     | 72     | 55     | 85     | 4.138                       | 1.869  | 2.598  | 6.017  | 4.857  | 7.56   |
| sof-miR162-3p   | 1855            | 594    | 2599   | 1345   | 2108   | 2881   | 156.65                      | 50.45  | 217.81 | 112.39 | 186.16 | 256.24 |
| sof-miR162-5p   | 30              | 0      | 4      | 8      | 18     | 12     | 2.533                       | 0      | 0.335  | 0.669  | 1.59   | 1.067  |
| sof-miR164a-3p  | 4               | 0      | 0      | 4      | 8      | 7      | 0.338                       | 0      | 0      | 0.334  | 0.706  | 0.623  |
| sof-miR164a-5p  | 7               | 5      | 39     | 9      | 14     | 25     | 0.591                       | 0.425  | 3.268  | 0.752  | 1.236  | 2.224  |
| sof-miR164b-3p  | 5               | 0      | 0      | 2      | 2      | 0      | 0.422                       | 0      | 0      | 0.167  | 0.177  | 0      |
| sof-miR164b-5p  | 1               | 3      | 14     | 0      | 2      | 1      | 0.084                       | 0.255  | 1.173  | 0      | 0.177  | 0.089  |
| sof-miR164c-3p  | 4               | 1      | 0      | 6      | 3      | 8      | 0.338                       | 0.085  | 0      | 0.501  | 0.265  | 0.712  |
| sof-miR164c-5p  | 7               | 6      | 39     | 10     | 14     | 26     | 0.591                       | 0.51   | 3.268  | 0.836  | 1.236  | 2.312  |
| sof-miR166a-3p  | 2E+06           | 465884 | 692073 | 673343 | 758826 | 864545 | 129817                      | 39569  | 58000  | 56267  | 67011  | 76893  |
| sof-miR166a-5p  | 47              | 0      | 0      | 20     | 12     | 48     | 3.969                       | 0      | 0      | 1.671  | 1.06   | 4.269  |
| sof-miR166b-3p  | 132756          | 29259  | 194712 | 167750 | 197451 | 288109 | 11211                       | 2485   | 16318  | 14018  | 17437  | 25625  |
| sof-miR166b-5p  | 225             | 23     | 163    | 276    | 330    | 496    | 19                          | 1.953  | 13.66  | 23.064 | 29.142 | 44.115 |
| sof-miR166c-3p  | 2E+06           | 480774 | 854415 | 694047 | 830614 | 917297 | 134226                      | 40833  | 71605  | 57997  | 73350  | 81585  |
| sof-miR166c-5p  | 129             | 57     | 136    | 141    | 418    | 192    | 10.894                      | 4.841  | 11.398 | 11.783 | 36.913 | 17.077 |
| sof-miR166d-3p  | 2E+06           | 474015 | 848551 | 689212 | 818285 | 909069 | 133587                      | 40259  | 71114  | 57593  | 72262  | 80853  |
| sof-miR166d-5p  | 50              | 15     | 245    | 42     | 43     | 86     | 4.222                       | 1.274  | 20.533 | 3.51   | 3.797  | 7.649  |
| sof-miR166e-3p  | 101487          | 22073  | 172991 | 146777 | 185199 | 265240 | 8570.2                      | 1874.7 | 14498  | 12265  | 16355  | 23591  |
| sof-miR166e-5p  | 374             | 66     | 15     | 209    | 82     | 123    | 31.583                      | 5.606  | 1.257  | 17.465 | 7.241  | 10.94  |
| sof-miR166f-3p  | 2E+06           | 486004 | 862069 | 815802 | 938150 | 1E+06  | 137889                      | 41277  | 72247  | 68172  | 82847  | 100119 |
| sof-miR166f-5p  | 167             | 76     | 309    | 222    | 185    | 262    | 14.102                      | 6.455  | 25.896 | 18.551 | 16.337 | 23.302 |
| sof-miR166g-3p  | 39271           | 12773  | 23964  | 32295  | 18069  | 22675  | 3316.3                      | 1084.8 | 2008.3 | 2698.7 | 1595.7 | 2016.7 |
| sof-miR166g-5p  | 667             | 203    | 26     | 712    | 108    | 286    | 56.325                      | 17.241 | 2.179  | 59.498 | 9.537  | 25.437 |
| sof-miR167a-3p  | 40              | 12     | 366    | 3      | 72     | 319    | 3.378                       | 1.019  | 30.673 | 0.251  | 6.358  | 28.372 |
| sof-miR167a-5p  | 296             | 17     | 9805   | 114    | 727    | 1460   | 24.996                      | 1.444  | 821.72 | 9.526  | 64.2   | 129.85 |
| sof-miR167b-3p  | 24              | 1      | 260    | 17     | 74     | 492    | 2.027                       | 0.085  | 21.79  | 1.421  | 6.535  | 43.759 |
| sof-miR167b-5p  | 275             | 7      | 9639   | 137    | 717    | 1525   | 23.223                      | 0.595  | 807.81 | 11.448 | 63.317 | 135.64 |
| sof-miR167c-3p  | 0               | 0      | 10     | 0      | 6      | 0      | 0                           | 0      | 0.838  | 0      | 0.53   | 0      |
| sof-miR167c-5p  | 296             | 17     | 9817   | 114    | 729    | 1466   | 24.996                      | 1.444  | 822.73 | 9.526  | 64.377 | 130.39 |
| sof-miR168-3p   | 6770            | 3379   | 14332  | 5669   | 6468   | 13564  | 571.7                       | 286.99 | 1201.1 | 473.73 | 571.18 | 1206.4 |
| sof-miR168-5p   | 38703           | 9023   | 40431  | 22487  | 22193  | 44919  | 3268.3                      | 766.35 | 3388.4 | 1879.1 | 1959.8 | 3995.1 |
| sof-miR169a-3p  | 0               | 0      | 5      | 0      | 0      | 0      | 0                           | 0      | 0.419  | 0      | 0      | 0.089  |
| sof-miR169a-5p  | 1               | 1      | 16     | 0      | 0      | 0      | 0.084                       | 0.085  | 1.341  | 0      | 0      | 0      |
| sof-miR169b-5p  | 0               | 0      | 7      | 0      | 0      | 0      | 0                           | 0      | 0.587  | 0      | 0      | 0      |
| sof-miR171a-3p  | 62              | 10     | 71     | 53     | 61     | 167    | 5.236                       | 0.849  | 5.95   | 4.429  | 5.387  | 14.853 |
| sof-miR171a-5p  | 139             | 25     | 13     | 225    | 151    | 125    | 11.738                      | 2.123  | 1.089  | 18.802 | 13.335 | 11.118 |
| sof-miR171b-3p  | 61              | 10     | 69     | 52     | 60     | 166    | 5.151                       | 0.849  | 5.783  | 4.345  | 5.299  | 14.764 |
| sof-miR171c-3p  | 298             | 8      | 956    | 30     | 77     | 90     | 25.165                      | 0.679  | 80.119 | 2.507  | 6.8    | 8.005  |
| sof-miR171c-5p  | 166             | 6      | 173    | 22     | 31     | 33     | 14.018                      | 0.51   | 14.499 | 1.838  | 2.738  | 2.935  |
| sof-miR171d-3p  | 61              | 10     | 68     | 51     | 59     | 166    | 5.151                       | 0.849  | 5.699  | 4.262  | 5.21   | 14.764 |
| sof-miR171d-5p  | 15              | 0      | 3      | 6      | 15     | 2      | 1.267                       | 0      | 0.251  | 0.501  | 1.325  | 0.178  |
| sof-miR171e-5p  | 1               | 0      | 1      | 0      | 0      | 2      | 0.084                       | 0      | 0.084  | 0      | 0      | 0.178  |
| sof-miR171f-3p  | 36              | 8      | 98     | 108    | 32     | 141    | 3.04                        | 0.679  | 8.213  | 9.025  | 2.826  | 12.541 |
| sof-miR172-3p   | 59              | 5      | 56     | 64     | 31     | 53     | 4.982                       | 0.425  | 4.693  | 5.348  | 2.738  | 4.714  |
| sof-miR172-5p   | 69              | 1      | 29     | 58     | 88     | 76     | 5.827                       | 0.085  | 2.43   | 4.847  | 7.771  | 6.759  |
| sof-miR2275-5p  | 34              | 20     | 1      | 3      | 71     | 14     | 2.871                       | 1.699  | 0.084  | 0.251  | 6.27   | 1.245  |
| sof-miR319-3p   | 4791            | 19556  | 1955   | 69     | 15     | 17     | 404.58                      | 1660.9 | 163.84 | 5.766  | 1.325  | 1.512  |
| sof-miR390-3p   | 20              | 3      | 6      | 31     | 20     | 34     | 1.689                       | 0.255  | 0.503  | 2.59   | 1.766  | 3.024  |
| sof-miR390-5p   | 179             | 31     | 258    | 531    | 420    | 757    | 15.116                      | 2.633  | 21.622 | 44.373 | 37.09  | 67.328 |
| sof-miR393-3p   | 110             | 37     | 360    | 71     | 119    | 237    | 9.289                       | 3.142  | 30.17  | 5.933  | 10.509 | 21.079 |
| sof-miR393-5p   | 539             | 141    | 1795   | 295    | 354    | 938    | 45.516                      | 11.975 | 150.43 | 24.651 | 31.261 | 83.426 |
| sof-miR394-5p   | 57              | 20     | 58     | 58     | 37     | 68     | 4.813                       | 1.699  | 4.861  | 4.847  | 3.267  | 6.048  |
| sof-miR395a-3p  | 23              | 13     | 67     | 20     | 104    | 141    | 1.942                       | 1.104  | 5.615  | 1.671  | 9.184  | 12.541 |
| sof-miR395a-5p  | 0               | 0      | 7      | 2      | 18     | 1      | 0                           | 0      | 0.587  | 0.167  | 1.59   | 0.089  |
| sof-miR395b-3p  | 0               | 0      | 0      | 0      | 2      | 4      | 0                           | 0      | 0      | 0      | 0.177  | 0.356  |
| sof-miR395b-5p  | 23              | 13     | 65     | 20     | 91     | 141    | 1.942                       | 1.104  | 5.447  | 1.671  | 8.036  | 12.541 |
| sof-miR395c-5p  | 23              | 11     | 67     | 20     | 104    | 141    | 1.942                       | 0.934  | 5.615  | 1.671  | 9.184  | 12.541 |
| sof-miR396a-3p  | 21              | 0      | 38     | 6      | 38     | 30     | 1.773                       | 0      | 3.185  | 0.501  | 3.356  | 2.668  |
| sof-miR396a-5p  | 7760            | 359    | 75303  | 1304   | 10499  | 18033  | 655.3                       | 30.491 | 6310.9 | 108.97 | 927.15 | 1603.9 |
| sof-miR396b-3p  | 11              | 0      | 22     | 1      | 0      | 12     | 0.929                       | 0      | 1.844  | 0.084  | 0      | 1.067  |
| sof-miR396b-5p  | 7746            | 359    | 75516  | 1296   | 10500  | 18030  | 654.12                      | 30.491 | 6328.7 | 108.3  | 927.24 | 1603.6 |
| sof-miR396c-3p  | 37              | 0      | 308    | 14     | 55     | 77     | 3.124                       | 0      | 25.812 | 1.17   | 4.857  | 6.848  |
| sof-miR408-3p   | 5               | 2      | 217    | 10     | 61     | 130    | 0.422                       | 0.17   | 18.186 | 0.836  | 5.387  | 11.562 |
| sof-miR408-5p   | 1               | 0      | 54     | 6      | 9      | 47     | 0.084                       | 0      | 4.526  | 0.501  | 0.795  | 4.18   |
| sof-miR437a-3p  | 1               | 1      | 2      | 2      | 2      | 5      | 0.084                       | 0.085  | 0.168  | 0.167  | 0.177  | 0.445  |
| sof-miR437b-3p  | 61              | 23     | 94     | 61     | 47     | 57     | 5.151                       | 1.953  | 7.878  | 5.097  | 4.151  | 5.07   |
| sof-miR528-3p   | 2               | 0      | 4      | 2      | 7      | 8      | 0.169                       | 0      | 0.335  | 0.167  | 0.618  | 0.712  |
| sof-miR528-5p   | 0               | 1      | 3      | 12     | 6      | 3      | 0                           | 0.085  | 0.251  | 1.003  | 0.53   | 0.267  |
| sof-miR5384-3p  | 18              | 0      | 115    | 10     | 0      | 12     | 1.52                        | 0      | 9.638  | 0.836  | 0      | 1.067  |
| sof-miR5564a-3p | 28              | 11     | 10     | 24     | 16     | 20     | 2.364                       | 0.934  | 0.838  | 2.006  | 1.413  | 1.779  |
| sof-miR5564a-5p | 3483            | 838    | 2905   | 4672   | 8211   | 2409   | 294.13                      | 71.173 | 243.46 | 390.41 | 725.1  | 214.26 |
| sof-miR5564b-3p | 102             | 46     | 116    | 113    | 32     | 42     | 8.613                       | 3.907  | 9.722  | 9.443  | 2.826  | 3.736  |

|                 |      |     |      |      |      |      |        |        |        |        |        |        |
|-----------------|------|-----|------|------|------|------|--------|--------|--------|--------|--------|--------|
| sof-miR5564b-5p | 1050 | 260 | 595  | 794  | 1022 | 769  | 88.668 | 22.082 | 49.865 | 66.35  | 90.252 | 68.395 |
| sof-miR5564c-5p | 3772 | 868 | 3014 | 4915 | 8628 | 2597 | 318.53 | 73.721 | 252.59 | 410.72 | 761.93 | 230.98 |
| sof-miR5568a-5p | 13   | 1   | 15   | 20   | 6    | 10   | 1.098  | 0.085  | 1.257  | 1.671  | 0.53   | 0.889  |
| sof-miR5568b-5p | 166  | 57  | 275  | 254  | 305  | 252  | 14.018 | 4.841  | 23.047 | 21.225 | 26.934 | 22.413 |
| sof-miR5568c-5p | 0    | 0   | 1    | 6    | 2    | 6    | 0      | 0      | 0.084  | 0.501  | 0.177  | 0.534  |
| sof-miR5568d-3p | 30   | 5   | 34   | 28   | 35   | 34   | 2.533  | 0.425  | 2.849  | 2.34   | 3.091  | 3.024  |
| sof-miR5568e-3p | 0    | 0   | 0    | 2    | 0    | 0    | 0      | 0      | 0      | 0.167  | 0      | 0      |
| sof-miR5568e-5p | 114  | 49  | 165  | 187  | 207  | 147  | 9.627  | 4.162  | 13.828 | 15.626 | 18.28  | 13.074 |
| sof-miR6223a-3p | 1    | 0   | 0    | 1    | 7    | 1    | 0.084  | 0      | 0      | 0.084  | 0.618  | 0.089  |
| sof-miR6223b-5p | 1    | 0   | 0    | 6    | 0    | 0    | 0.084  | 0      | 0      | 0.501  | 0      | 0      |
| sof-miRN001-5p  | 1    | 1   | 0    | 0    | 3    | 0    | 0.084  | 0.085  | 0      | 0      | 0.265  | 0      |
| sof-miRN002-3p  | 1    | 0   | 0    | 2    | 1    | 0    | 0.084  | 0      | 0      | 0.167  | 0.088  | 0      |
| sof-miRN002-5p  | 4    | 0   | 5    | 12   | 12   | 5    | 0.338  | 0      | 0.419  | 1.003  | 1.06   | 0.445  |
| sof-miRN003-3p  | 0    | 3   | 3    | 5    | 0    | 3    | 0      | 0.255  | 0.251  | 0.418  | 0      | 0.267  |
| sof-miRN003-5p  | 62   | 1   | 3    | 6    | 2    | 17   | 5.236  | 0.085  | 0.251  | 0.501  | 0.177  | 1.512  |
| sof-miRN004-3p  | 12   | 4   | 1    | 14   | 14   | 12   | 1.013  | 0.34   | 0.084  | 1.17   | 1.236  | 1.067  |
| sof-miRN005-3p  | 24   | 292 | 608  | 923  | 2481 | 46   | 2.027  | 24.8   | 50.954 | 77.13  | 219.09 | 4.091  |
| sof-miRN005-5p  | 0    | 4   | 6    | 8    | 1    | 0    | 0      | 0.34   | 0.503  | 0.669  | 0.088  | 0      |
| sof-miRN006-3p  | 2    | 0   | 0    | 0    | 0    | 0    | 0.169  | 0      | 0      | 0      | 0      | 0      |
| sof-miRN006-5p  | 3    | 1   | 0    | 0    | 0    | 0    | 0.253  | 0.085  | 0      | 0      | 0      | 0      |
| sof-miRN007-5p  | 166  | 57  | 275  | 254  | 305  | 252  | 14.018 | 4.841  | 23.047 | 21.225 | 26.934 | 22.413 |
| sof-miRN008-3p  | 0    | 0   | 0    | 0    | 0    | 3    | 0      | 0      | 0      | 0      | 0      | 0.267  |
| sof-miRN009-5p  | 1    | 1   | 0    | 6    | 2    | 3    | 0.084  | 0.085  | 0      | 0.501  | 0.177  | 0.267  |
| sof-miRN010-5p  | 57   | 28  | 172  | 149  | 92   | 76   | 4.813  | 2.378  | 14.415 | 12.451 | 8.124  | 6.759  |
| sof-miRN011-3p  | 2    | 0   | 0    | 5    | 5    | 6    | 0.169  | 0      | 0      | 0.418  | 0.442  | 0.534  |
| sof-miRN013-3p  | 17   | 17  | 6    | 0    | 20   | 5    | 1.436  | 1.444  | 0.503  | 0      | 1.766  | 0.445  |
| sof-miRN013-5p  | 5    | 23  | 1    | 4    | 1    | 0    | 0.422  | 1.953  | 0.084  | 0.334  | 0.088  | 0      |
| sof-miRN014-3p  | 0    | 5   | 81   | 46   | 76   | 4    | 0      | 0.425  | 6.788  | 3.844  | 6.711  | 0.356  |
| sof-miRN014-5p  | 2    | 131 | 442  | 269  | 477  | 40   | 0.169  | 11.126 | 37.042 | 22.479 | 42.123 | 3.558  |
| sof-miRN015-3p  | 0    | 0   | 0    | 0    | 0    | 1    | 0      | 0      | 0      | 0      | 0      | 0.089  |
| sof-miRN016-3p  | 8    | 2   | 8    | 12   | 38   | 15   | 0.676  | 0.17   | 0.67   | 1.003  | 3.356  | 1.334  |
| sof-miRN017-3p  | 27   | 9   | 11   | 13   | 6    | 27   | 2.28   | 0.764  | 0.922  | 1.086  | 0.53   | 2.401  |
| sof-miRN018-5p  | 31   | 69  | 53   | 62   | 47   | 26   | 2.618  | 5.86   | 4.442  | 5.181  | 4.151  | 2.312  |
| sof-miRN019-3p  | 28   | 22  | 14   | 14   | 20   | 10   | 2.364  | 1.869  | 1.173  | 1.17   | 1.766  | 0.889  |
| sof-miRN020-3p  | 20   | 43  | 10   | 18   | 8    | 10   | 1.689  | 3.652  | 0.838  | 1.504  | 0.706  | 0.889  |
| sof-miRN021-5p  | 9    | 7   | 8    | 7    | 4    | 13   | 0.76   | 0.595  | 0.67   | 0.585  | 0.353  | 1.156  |
| sof-miRN022-5p  | 13   | 2   | 5    | 7    | 9    | 9    | 1.098  | 0.17   | 0.419  | 0.585  | 0.795  | 0.8    |
| sof-miRN023-5p  | 42   | 27  | 33   | 18   | 20   | 16   | 3.547  | 2.293  | 2.766  | 1.504  | 1.766  | 1.423  |
| sof-miRN024-3p  | 2    | 1   | 3    | 11   | 2    | 2    | 0.169  | 0.085  | 0.251  | 0.919  | 0.177  | 0.178  |
| sof-miRN024-5p  | 0    | 0   | 1    | 1    | 2    | 0    | 0      | 0      | 0.084  | 0.084  | 0.177  | 0      |
| sof-miRN026-3p  | 24   | 6   | 17   | 26   | 20   | 23   | 2.027  | 0.51   | 1.425  | 2.173  | 1.766  | 2.046  |
| sof-miRN027-5p  | 79   | 17  | 133  | 104  | 133  | 131  | 6.671  | 1.444  | 11.146 | 8.691  | 11.745 | 11.651 |
| sof-miRN028-3p  | 17   | 4   | 79   | 39   | 30   | 19   | 1.436  | 0.34   | 6.621  | 3.259  | 2.649  | 1.69   |
| sof-miRN028-5p  | 9    | 3   | 15   | 11   | 20   | 40   | 0.76   | 0.255  | 1.257  | 0.919  | 1.766  | 3.558  |
| sof-miRN029-5p  | 24   | 5   | 47   | 16   | 26   | 19   | 2.027  | 0.425  | 3.939  | 1.337  | 2.296  | 1.69   |
| sof-miRN030-5p  | 2    | 3   | 0    | 3    | 1    | 2    | 0.169  | 0.255  | 0      | 0.251  | 0.088  | 0.178  |
| sof-miRN031-3p  | 7    | 8   | 12   | 25   | 32   | 11   | 0.591  | 0.679  | 1.006  | 2.089  | 2.826  | 0.978  |
| sof-miRN032-5p  | 4    | 0   | 12   | 0    | 1    | 0    | 0.338  | 0      | 1.006  | 0      | 0.088  | 0      |
| sof-miRN033-3p  | 12   | 0   | 3    | 1    | 13   | 16   | 1.013  | 0      | 0.251  | 0.084  | 1.148  | 1.423  |
| sof-miRN034-3p  | 7    | 0   | 0    | 0    | 2    | 2    | 0.591  | 0      | 0      | 0      | 0.177  | 0.178  |
| sof-miRN035-3p  | 0    | 0   | 13   | 0    | 0    | 0    | 0      | 0      | 1.089  | 0      | 0      | 0      |
| sof-miRN036-3p  | 0    | 0   | 0    | 0    | 0    | 2    | 0      | 0      | 0      | 0      | 0      | 0.178  |
| sof-miRN038-5p  | 1    | 2   | 1    | 5    | 0    | 2    | 0.084  | 0.17   | 0.084  | 0.418  | 0      | 0.178  |
| sof-miRN039-5p  | 3    | 7   | 0    | 2    | 4    | 3    | 0.253  | 0.595  | 0      | 0.167  | 0.353  | 0.267  |
| sof-miRN041-3p  | 0    | 0   | 18   | 1    | 5    | 0    | 0      | 0      | 1.509  | 0.084  | 0.442  | 0      |
| sof-miRN042-5p  | 5    | 0   | 2    | 0    | 19   | 1    | 0.422  | 0      | 0.168  | 0      | 1.678  | 0.089  |
| sof-miRN043-5p  | 0    | 0   | 0    | 1    | 0    | 4    | 0      | 0      | 0      | 0.084  | 0      | 0.356  |
| sof-miRN044-5p  | 22   | 15  | 43   | 7    | 20   | 1    | 1.858  | 1.274  | 3.604  | 0.585  | 1.766  | 0.089  |
| sof-miRN045-3p  | 16   | 15  | 24   | 10   | 4    | 21   | 1.351  | 1.274  | 2.011  | 0.836  | 0.353  | 1.868  |
| sof-miRN047-3p  | 0    | 0   | 1    | 0    | 0    | 1    | 0      | 0      | 0.084  | 0      | 0      | 0.089  |
| sof-miRN048-3p  | 10   | 48  | 48   | 34   | 41   | 67   | 0.844  | 4.077  | 4.023  | 2.841  | 3.621  | 5.959  |
| sof-miRN049-3p  | 14   | 1   | 0    | 0    | 0    | 0    | 1.182  | 0.085  | 0      | 0      | 0      | 0      |
| sof-miRN049-5p  | 3    | 0   | 0    | 0    | 0    | 0    | 0.253  | 0      | 0      | 0      | 0      | 0      |
| sof-miRN050-5p  | 20   | 24  | 41   | 13   | 14   | 26   | 1.689  | 2.038  | 3.436  | 1.086  | 1.236  | 2.312  |
| sof-miRN051-3p  | 0    | 0   | 0    | 12   | 6    | 0    | 0      | 0      | 0      | 1.003  | 0.53   | 0      |
| sof-miRN054-3p  | 225  | 165 | 1383 | 96   | 221  | 717  | 19     | 14.014 | 115.9  | 8.022  | 19.516 | 63.771 |
| sof-miRN055-3p  | 0    | 1   | 9    | 5    | 3    | 6    | 0      | 0.085  | 0.754  | 0.418  | 0.265  | 0.534  |
| sof-miRN056-3p  | 23   | 18  | 68   | 58   | 97   | 58   | 1.942  | 1.529  | 5.699  | 4.847  | 8.566  | 5.159  |
| sof-miRN057-5p  | 50   | 21  | 208  | 59   | 39   | 38   | 4.222  | 1.784  | 17.432 | 4.93   | 3.444  | 3.38   |
| sof-miRN058-5p  | 0    | 1   | 7    | 0    | 0    | 0    | 0      | 0.085  | 0.587  | 0      | 0      | 0      |
| sof-miRN059-3p  | 1    | 0   | 0    | 0    | 0    | 1    | 0.084  | 0      | 0      | 0      | 0      | 0.089  |
| sof-miRN060-3p  | 100  | 114 | 66   | 106  | 52   | 46   | 8.445  | 9.682  | 5.531  | 8.858  | 4.592  | 4.091  |
| sof-miRN061-5p  | 8    | 7   | 33   | 22   | 16   | 10   | 0.676  | 0.595  | 2.766  | 1.838  | 1.413  | 0.889  |
| sof-miRN062-3p  | 18   | 21  | 23   | 26   | 17   | 30   | 1.52   | 1.784  | 1.928  | 2.173  | 1.501  | 2.668  |
| sof-miRN063-3p  | 1    | 6   | 13   | 3    | 5    | 10   | 0.084  | 0.51   | 1.089  | 0.251  | 0.442  | 0.889  |
| sof-miRN064-3p  | 0    | 0   | 0    | 0    | 0    | 1    | 0      | 0      | 0      | 0      | 0      | 0.089  |
| sof-miRN065-3p  | 0    | 3   | 2    | 2    | 20   | 14   | 0      | 0.255  | 0.168  | 0.167  | 1.766  | 1.245  |
| sof-miRN066-3p  | 7    | 13  | 12   | 10   | 24   | 18   | 0.591  | 1.104  | 1.006  | 0.836  | 2.119  | 1.601  |
| sof-miRN070-3p  | 12   | 17  | 2    | 3    | 4    | 4    | 1.013  | 1.444  | 0.168  | 0.251  | 0.353  | 0.356  |
| sof-miRN071-5p  | 0    | 0   | 0    | 1    | 0    | 1    | 0      | 0      | 0      | 0.084  | 0      | 0.089  |
| sof-miRN072-3p  | 4    | 2   | 7    | 16   | 1    | 1    | 0.338  | 0.17   | 0.587  | 1.337  | 0.088  | 0.089  |
| sof-miRN073-5p  | 11   | 0   | 0    | 0    | 1    | 0    | 0.929  | 0      | 0      | 0      | 0.088  | 0      |
| sof-miRN074-3p  | 11   | 1   | 18   | 18   | 12   | 1    | 0.929  | 0.085  | 1.509  | 1.504  | 1.06   | 0.089  |
| sof-miRN075-3p  | 0    | 0   | 1    | 4    | 2    | 11   | 0      | 0      | 0.084  | 0.334  | 0.177  | 0.978  |
| sof-miRN078-3p  | 8    | 1   | 0    | 4    | 0    | 3    | 0.676  | 0.085  | 0      | 0.334  | 0      | 0.267  |
| sof-miRN078-5p  | 17   | 7   | 4    | 22   | 12   | 34   | 1.436  | 0.595  | 0.335  | 1.838  | 1.06   | 3.024  |
| sof-miRN079-3p  | 8    | 4   | 8    | 15   | 5    | 0    | 0.676  | 0.34   | 0.67   | 1.253  | 0.442  | 0      |

|                |     |     |     |     |     |     |        |        |        |        |        |        |
|----------------|-----|-----|-----|-----|-----|-----|--------|--------|--------|--------|--------|--------|
| sof-miRN080-3p | 0   | 0   | 0   | 0   | 7   | 0   | 0      | 0      | 0      | 0      | 0.618  | 0      |
| sof-miRN081-3p | 3   | 7   | 12  | 8   | 10  | 4   | 0.253  | 0.595  | 1.006  | 0.669  | 0.883  | 0.356  |
| sof-miRN083-3p | 1   | 1   | 17  | 6   | 3   | 12  | 0.084  | 0.085  | 1.425  | 0.501  | 0.265  | 1.067  |
| sof-miRN084-5p | 0   | 11  | 0   | 17  | 0   | 0   | 0      | 0.934  | 0      | 1.421  | 0      | 0      |
| sof-miRN085-5p | 12  | 21  | 1   | 17  | 6   | 6   | 1.013  | 1.784  | 0.084  | 1.421  | 0.53   | 0.534  |
| sof-miRN086-3p | 3   | 2   | 13  | 8   | 0   | 3   | 0.253  | 0.17   | 1.089  | 0.669  | 0      | 0.267  |
| sof-miRN088-3p | 19  | 2   | 6   | 5   | 24  | 16  | 1.604  | 0.17   | 0.503  | 0.418  | 2.119  | 1.423  |
| sof-miRN089-5p | 36  | 7   | 3   | 3   | 14  | 66  | 3.04   | 0.595  | 0.251  | 0.251  | 1.236  | 5.87   |
| sof-miRN090-3p | 0   | 4   | 14  | 0   | 1   | 0   | 0      | 0.34   | 1.173  | 0      | 0.088  | 0      |
| sof-miRN092-3p | 26  | 31  | 35  | 18  | 31  | 20  | 2.196  | 2.633  | 2.933  | 1.504  | 2.738  | 1.779  |
| sof-miRN093-3p | 24  | 4   | 22  | 9   | 43  | 37  | 2.027  | 0.34   | 1.844  | 0.752  | 3.797  | 3.291  |
| sof-miRN094-3p | 1   | 0   | 1   | 0   | 4   | 0   | 0.084  | 0      | 0.084  | 0      | 0.353  | 0      |
| sof-miRN095-5p | 2   | 4   | 6   | 5   | 3   | 3   | 0.169  | 0.34   | 0.503  | 0.418  | 0.265  | 0.267  |
| sof-miRN096-5p | 66  | 61  | 68  | 59  | 74  | 54  | 5.573  | 5.181  | 5.699  | 4.93   | 6.535  | 4.803  |
| sof-miRN097-5p | 534 | 281 | 294 | 277 | 90  | 113 | 45.094 | 23.866 | 24.639 | 23.147 | 7.948  | 10.05  |
| sof-miRN098-3p | 1   | 1   | 0   | 0   | 0   | 0   | 0.084  | 0.085  | 0      | 0      | 0      | 0      |
| sof-miRN099-5p | 158 | 85  | 287 | 190 | 212 | 127 | 13.342 | 7.219  | 24.052 | 15.877 | 18.721 | 11.295 |
| sof-miRN100-3p | 5   | 8   | 3   | 0   | 5   | 5   | 0.422  | 0.679  | 0.251  | 0      | 0.442  | 0.445  |
| sof-miRN101-3p | 22  | 29  | 8   | 3   | 8   | 11  | 1.858  | 2.463  | 0.67   | 0.251  | 0.706  | 0.978  |
| sof-miRN102-5p | 0   | 0   | 0   | 1   | 0   | 0   | 0      | 0      | 0      | 0.084  | 0      | 0      |
| sof-miRN107-3p | 31  | 27  | 21  | 14  | 13  | 18  | 2.618  | 2.293  | 1.76   | 1.17   | 1.148  | 1.601  |
| sof-miRN108-3p | 27  | 19  | 70  | 18  | 12  | 4   | 2.28   | 1.614  | 5.866  | 1.504  | 1.06   | 0.356  |
| sof-miRN109-5p | 34  | 4   | 16  | 60  | 47  | 18  | 2.871  | 0.34   | 1.341  | 5.014  | 4.151  | 1.601  |
| sof-miRN110-3p | 30  | 19  | 11  | 9   | 24  | 13  | 2.533  | 1.614  | 0.922  | 0.752  | 2.119  | 1.156  |
| sof-miRN111-3p | 2   | 1   | 2   | 1   | 0   | 0   | 0.169  | 0.085  | 0.168  | 0.084  | 0      | 0      |
| sof-miRN112-3p | 50  | 26  | 99  | 30  | 28  | 43  | 4.222  | 2.208  | 8.297  | 2.507  | 2.473  | 3.824  |
| sof-miRN113-3p | 13  | 7   | 12  | 6   | 10  | 2   | 1.098  | 0.595  | 1.006  | 0.501  | 0.883  | 0.178  |
| sof-miRN115-5p | 116 | 76  | 204 | 82  | 114 | 83  | 9.796  | 6.455  | 17.097 | 6.852  | 10.067 | 7.382  |
| sof-miRN116-5p | 3   | 0   | 0   | 0   | 0   | 0   | 0.253  | 0      | 0      | 0      | 0      | 0      |
| sof-miRN117-5p | 1   | 4   | 8   | 0   | 0   | 1   | 0.084  | 0.34   | 0.67   | 0      | 0      | 0.089  |
| sof-miRN118-5p | 14  | 7   | 14  | 22  | 3   | 14  | 1.182  | 0.595  | 1.173  | 1.838  | 0.265  | 1.245  |
| sof-miRN119-3p | 0   | 0   | 4   | 8   | 4   | 4   | 0      | 0      | 0.335  | 0.669  | 0.353  | 0.356  |
| sof-miRN119-5p | 1   | 1   | 10  | 3   | 1   | 5   | 0.084  | 0.085  | 0.838  | 0.251  | 0.088  | 0.445  |
| sof-miRN120-3p | 16  | 15  | 44  | 0   | 34  | 0   | 1.351  | 1.274  | 3.687  | 0      | 3.002  | 0      |
| sof-miRN120-5p | 8   | 29  | 1   | 1   | 4   | 2   | 0.676  | 2.463  | 0.084  | 0.084  | 0.353  | 0.178  |
| sof-miRN123-5p | 22  | 7   | 13  | 10  | 11  | 2   | 1.858  | 0.595  | 1.089  | 0.836  | 0.971  | 0.178  |
| sof-miRN124-3p | 1   | 0   | 0   | 0   | 0   | 0   | 0.084  | 0      | 0      | 0      | 0      | 0      |
| sof-miRN125-5p | 2   | 6   | 0   | 3   | 4   | 0   | 0.169  | 0.51   | 0      | 0.251  | 0.353  | 0      |
| sof-miRN128-3p | 0   | 0   | 1   | 0   | 1   | 0   | 0      | 0      | 0.084  | 0      | 0.088  | 0      |
| sof-miRN129-5p | 27  | 0   | 36  | 13  | 8   | 19  | 2.28   | 0      | 3.017  | 1.086  | 0.706  | 1.69   |
| sof-miRN130-3p | 4   | 0   | 2   | 1   | 0   | 10  | 0.338  | 0      | 0.168  | 0.084  | 0      | 0.889  |
| sof-miRN130-5p | 0   | 0   | 2   | 0   | 0   | 1   | 0      | 0      | 0.168  | 0      | 0      | 0.089  |
| sof-miRN131-5p | 11  | 6   | 3   | 3   | 1   | 1   | 0.929  | 0.51   | 0.251  | 0.251  | 0.088  | 0.089  |
| sof-miRN133-5p | 0   | 0   | 0   | 1   | 0   | 0   | 0      | 0      | 0      | 0.084  | 0      | 0      |
| sof-miRN134-3p | 71  | 152 | 146 | 49  | 93  | 506 | 5.996  | 12.91  | 12.236 | 4.095  | 8.213  | 45.004 |
| sof-miRN134-5p | 2   | 12  | 24  | 12  | 5   | 59  | 0.169  | 1.019  | 2.011  | 1.003  | 0.442  | 5.248  |
| sof-miRN136-3p | 5   | 6   | 10  | 4   | 1   | 3   | 0.422  | 0.51   | 0.838  | 0.334  | 0.088  | 0.267  |
| sof-miRN137-3p | 5   | 6   | 10  | 4   | 1   | 3   | 0.422  | 0.51   | 0.838  | 0.334  | 0.088  | 0.267  |
| sof-miRN138-5p | 0   | 1   | 70  | 104 | 0   | 0   | 0      | 0.085  | 5.866  | 8.691  | 0      | 0      |
| sof-miRN139-3p | 30  | 0   | 59  | 13  | 8   | 20  | 2.533  | 0      | 4.945  | 1.086  | 0.706  | 1.779  |
| sof-miRN140-3p | 44  | 2   | 0   | 0   | 2   | 14  | 3.716  | 0.17   | 0      | 0      | 0.177  | 1.245  |
| sof-miRN141-3p | 394 | 18  | 0   | 222 | 0   | 207 | 33.272 | 1.529  | 0      | 18.551 | 0      | 18.411 |
| sof-miRN142-5p | 12  | 1   | 16  | 15  | 1   | 11  | 1.013  | 0.085  | 1.341  | 1.253  | 0.088  | 0.978  |
| sof-miRN143-5p | 12  | 1   | 16  | 15  | 1   | 11  | 1.013  | 0.085  | 1.341  | 1.253  | 0.088  | 0.978  |
| sof-miRN144-3p | 30  | 0   | 59  | 13  | 8   | 20  | 2.533  | 0      | 4.945  | 1.086  | 0.706  | 1.779  |
| sof-miRN144-5p | 9   | 0   | 22  | 12  | 0   | 5   | 0.76   | 0      | 1.844  | 1.003  | 0      | 0.445  |
| sof-miRN145-3p | 16  | 7   | 1   | 1   | 107 | 1   | 1.351  | 0.595  | 0.084  | 0.084  | 9.449  | 0.089  |
| sof-miRN146-5p | 0   | 2   | 0   | 16  | 0   | 0   | 0      | 0.17   | 0      | 1.337  | 0      | 0      |
| sof-miRN147-5p | 2   | 2   | 0   | 1   | 0   | 1   | 0.169  | 0.17   | 0      | 0.084  | 0      | 0.089  |
| sof-miRN148-5p | 0   | 0   | 0   | 0   | 1   | 1   | 0      | 0      | 0      | 0      | 0.088  | 0.089  |
| sof-miRN149-3p | 3   | 2   | 12  | 11  | 6   | 2   | 0.253  | 0.17   | 1.006  | 0.919  | 0.53   | 0.178  |
| sof-miRN150-3p | 40  | 8   | 20  | 22  | 38  | 18  | 3.378  | 0.679  | 1.676  | 1.838  | 3.356  | 1.601  |
| sof-miRN151-3p | 1   | 0   | 1   | 2   | 0   | 0   | 0.084  | 0      | 0.084  | 0.167  | 0      | 0      |
| sof-miRN154-5p | 114 | 126 | 293 | 142 | 199 | 97  | 9.627  | 10.701 | 24.555 | 11.866 | 17.573 | 8.627  |
| sof-miRN155-5p | 114 | 126 | 293 | 142 | 199 | 97  | 9.627  | 10.701 | 24.555 | 11.866 | 17.573 | 8.627  |
| sof-miRN157-5p | 1   | 1   | 12  | 9   | 4   | 3   | 0.084  | 0.085  | 1.006  | 0.752  | 0.353  | 0.267  |
| sof-miRN158-3p | 0   | 0   | 0   | 1   | 0   | 0   | 0      | 0      | 0      | 0.084  | 0      | 0      |
| sof-miRN159-3p | 0   | 3   | 0   | 0   | 13  | 0   | 0      | 0.255  | 0      | 0      | 1.148  | 0      |
| sof-miRN160-3p | 10  | 7   | 21  | 9   | 2   | 3   | 0.844  | 0.595  | 1.76   | 0.752  | 0.177  | 0.267  |
| sof-miRN162-3p | 10  | 0   | 3   | 1   | 0   | 0   | 0.844  | 0      | 0.251  | 0.084  | 0      | 0      |
| sof-miRN162-5p | 1   | 0   | 0   | 0   | 0   | 1   | 0.084  | 0      | 0      | 0      | 0      | 0.089  |
| sof-miRN164-3p | 0   | 1   | 0   | 0   | 2   | 4   | 0      | 0.085  | 0      | 0      | 0.177  | 0.356  |
| sof-miRN164-5p | 168 | 84  | 0   | 98  | 64  | 111 | 14.187 | 7.134  | 0      | 8.189  | 5.652  | 9.872  |
| sof-miRN165-3p | 2   | 3   | 0   | 2   | 12  | 3   | 0.169  | 0.255  | 0      | 0.167  | 1.06   | 0.267  |
| sof-miRN167-3p | 0   | 0   | 171 | 0   | 2   | 0   | 0      | 0      | 14.331 | 0      | 0.177  | 0      |
| sof-miRN168-5p | 0   | 0   | 0   | 3   | 0   | 0   | 0      | 0      | 0      | 0.251  | 0      | 0      |
| sof-miRN174-3p | 1   | 0   | 16  | 21  | 0   | 3   | 0.084  | 0      | 1.341  | 1.755  | 0      | 0.267  |
| sof-miRN175-5p | 0   | 1   | 0   | 0   | 0   | 0   | 0      | 0.085  | 0      | 0      | 0      | 0      |
| sof-miRN177-3p | 15  | 4   | 32  | 18  | 7   | 34  | 1.267  | 0.34   | 2.682  | 1.504  | 0.618  | 3.024  |
| sof-miRN183-3p | 4   | 1   | 0   | 2   | 0   | 0   | 0.338  | 0.085  | 0      | 0.167  | 0      | 0      |
| sof-miRN183-5p | 2   | 12  | 2   | 8   | 0   | 2   | 0.169  | 1.019  | 0.168  | 0.669  | 0      | 0.178  |
| sof-miRN184-3p | 97  | 88  | 417 | 104 | 94  | 168 | 8.191  | 7.474  | 34.947 | 8.691  | 8.301  | 14.942 |
| sof-miRN185-5p | 1   | 0   | 1   | 0   | 1   | 1   | 0.084  | 0      | 0.084  | 0      | 0.088  | 0.089  |
| sof-miRN187-3p | 2   | 0   | 0   | 1   | 0   | 0   | 0.169  | 0      | 0      | 0.084  | 0      | 0      |
| sof-miRN188-5p | 0   | 0   | 0   | 1   | 0   | 0   | 0      | 0      | 0      | 0.084  | 0      | 0      |
| sof-miRN189-5p | 9   | 7   | 21  | 2   | 11  | 7   | 0.76   | 0.595  | 1.76   | 0.167  | 0.971  | 0.623  |
| sof-miRN190-5p | 34  | 9   | 1   | 7   | 19  | 3   | 2.871  | 0.764  | 0.084  | 0.585  | 1.678  | 0.267  |

|                |     |     |     |     |     |     |        |        |        |        |        |        |
|----------------|-----|-----|-----|-----|-----|-----|--------|--------|--------|--------|--------|--------|
| sof-miRN191-5p | 49  | 6   | 62  | 61  | 125 | 33  | 4.138  | 0.51   | 5.196  | 5.097  | 11.039 | 2.935  |
| sof-miRN192-3p | 8   | 3   | 7   | 5   | 24  | 21  | 0.676  | 0.255  | 0.587  | 0.418  | 2.119  | 1.868  |
| sof-miRN193-3p | 67  | 32  | 320 | 165 | 167 | 114 | 5.658  | 2.718  | 26.818 | 13.788 | 14.748 | 10.139 |
| sof-miRN193-5p | 61  | 13  | 150 | 127 | 245 | 78  | 5.151  | 1.104  | 12.571 | 10.613 | 21.636 | 6.937  |
| sof-miRN194-3p | 17  | 24  | 14  | 23  | 18  | 20  | 1.436  | 2.038  | 1.173  | 1.922  | 1.59   | 1.779  |
| sof-miRN196-5p | 21  | 13  | 16  | 7   | 9   | 7   | 1.773  | 1.104  | 1.341  | 0.585  | 0.795  | 0.623  |
| sof-miRN197-5p | 11  | 7   | 47  | 1   | 37  | 1   | 0.929  | 0.595  | 3.939  | 0.084  | 3.267  | 0.089  |
| sof-miRN198-5p | 17  | 0   | 16  | 17  | 10  | 11  | 1.436  | 0      | 1.341  | 1.421  | 0.883  | 0.978  |
| sof-miRN199-3p | 13  | 5   | 6   | 6   | 3   | 8   | 1.098  | 0.425  | 0.503  | 0.501  | 0.265  | 0.712  |
| sof-miRN199-5p | 1   | 0   | 1   | 0   | 0   | 0   | 0.084  | 0      | 0.084  | 0      | 0      | 0      |
| sof-miRN201-3p | 231 | 322 | 507 | 877 | 308 | 325 | 19.507 | 27.348 | 42.49  | 73.286 | 27.199 | 28.906 |
| sof-miRN202-3p | 39  | 15  | 106 | 21  | 24  | 6   | 3.293  | 1.274  | 8.883  | 1.755  | 2.119  | 0.534  |
| sof-miRN203-5p | 2   | 0   | 1   | 2   | 1   | 0   | 0.169  | 0      | 0.084  | 0.167  | 0.088  | 0      |
| sof-miRN204-5p | 2   | 0   | 0   | 2   | 30  | 0   | 0.169  | 0      | 0      | 0.167  | 2.649  | 0      |
| sof-miRN205-5p | 4   | 0   | 0   | 1   | 2   | 6   | 0.338  | 0      | 0      | 0.084  | 0.177  | 0.534  |
| sof-miRN207-5p | 84  | 186 | 63  | 191 | 39  | 35  | 7.093  | 15.797 | 5.28   | 15.961 | 3.444  | 3.113  |
| sof-miRN210-5p | 5   | 4   | 4   | 7   | 1   | 2   | 0.422  | 0.34   | 0.335  | 0.585  | 0.088  | 0.178  |
| sof-miRN212-3p | 0   | 1   | 0   | 2   | 0   | 0   | 0      | 0.085  | 0      | 0.167  | 0      | 0      |
| sof-miRN215-5p | 17  | 30  | 0   | 0   | 20  | 0   | 1.436  | 2.548  | 0      | 0      | 1.766  | 0      |
| sof-miRN218-3p | 15  | 4   | 7   | 16  | 13  | 8   | 1.267  | 0.34   | 0.587  | 1.337  | 1.148  | 0.712  |
| sof-miRN220-5p | 9   | 25  | 4   | 6   | 1   | 6   | 0.76   | 2.123  | 0.335  | 0.501  | 0.088  | 0.534  |
| sof-miRN222-5p | 31  | 19  | 93  | 57  | 38  | 65  | 2.618  | 1.614  | 7.794  | 4.763  | 3.356  | 5.781  |
| sof-miRN223-5p | 20  | 24  | 41  | 13  | 14  | 26  | 1.689  | 2.038  | 3.436  | 1.086  | 1.236  | 2.312  |
| sof-miRN225-5p | 1   | 1   | 0   | 2   | 0   | 0   | 0.084  | 0.085  | 0      | 0.167  | 0      | 0      |
| sof-miRN226-5p | 5   | 3   | 2   | 14  | 12  | 3   | 0.422  | 0.255  | 0.168  | 1.17   | 1.06   | 0.267  |
| sof-miRN228-3p | 9   | 3   | 16  | 4   | 6   | 4   | 0.76   | 0.255  | 1.341  | 0.334  | 0.53   | 0.356  |
| sof-miRN229-5p | 2   | 0   | 12  | 4   | 2   | 0   | 0.169  | 0      | 1.006  | 0.334  | 0.177  | 0      |
| sof-miRN230-5p | 2   | 0   | 12  | 4   | 2   | 0   | 0.169  | 0      | 1.006  | 0.334  | 0.177  | 0      |
| sof-miRN232-3p | 2   | 5   | 10  | 6   | 3   | 5   | 0.169  | 0.425  | 0.838  | 0.501  | 0.265  | 0.445  |
| sof-miRN233-5p | 50  | 4   | 3   | 9   | 2   | 17  | 4.222  | 0.34   | 0.251  | 0.752  | 0.177  | 1.512  |
| sof-miRN234-5p | 0   | 0   | 1   | 0   | 0   | 0   | 0      | 0      | 0.084  | 0      | 0      | 0      |
| sof-miRN235-5p | 61  | 60  | 168 | 32  | 83  | 77  | 5.151  | 5.096  | 14.079 | 2.674  | 7.33   | 6.848  |
| sof-miRN236-5p | 85  | 74  | 131 | 100 | 104 | 49  | 7.178  | 6.285  | 10.979 | 8.356  | 9.184  | 4.358  |
| sof-miRN237-3p | 117 | 75  | 186 | 68  | 108 | 62  | 9.88   | 6.37   | 15.588 | 5.682  | 9.537  | 5.514  |
| sof-miRN238-3p | 12  | 11  | 29  | 21  | 10  | 15  | 1.013  | 0.934  | 2.43   | 1.755  | 0.883  | 1.334  |
| sof-miRN239-3p | 13  | 0   | 1   | 3   | 3   | 5   | 1.098  | 0      | 0.084  | 0.251  | 0.265  | 0.445  |
| sof-miRN240-5p | 1   | 0   | 0   | 0   | 0   | 2   | 0.084  | 0      | 0      | 0      | 0      | 0.178  |
| sof-miRN241-3p | 4   | 5   | 0   | 1   | 0   | 3   | 0.338  | 0.425  | 0      | 0.084  | 0      | 0.267  |
| sof-miRN243-3p | 988 | 0   | 1   | 0   | 360 | 265 | 83.433 | 0      | 0.084  | 0      | 31.791 | 23.569 |
| sof-miRN245-5p | 1   | 84  | 6   | 13  | 10  | 15  | 0.084  | 7.134  | 0.503  | 1.086  | 0.883  | 1.334  |
| sof-miRN246-3p | 14  | 9   | 5   | 13  | 3   | 3   | 1.182  | 0.764  | 0.419  | 1.086  | 0.265  | 0.267  |
| sof-miRN249-5p | 22  | 8   | 14  | 12  | 4   | 7   | 1.858  | 0.679  | 1.173  | 1.003  | 0.353  | 0.623  |
| sof-miRN250-3p | 3   | 7   | 0   | 2   | 5   | 3   | 0.253  | 0.595  | 0      | 0.167  | 0.442  | 0.267  |
| sof-miRN251-3p | 1   | 3   | 0   | 0   | 0   | 2   | 0.084  | 0.255  | 0      | 0      | 0      | 0.178  |
| sof-miRN252-3p | 3   | 4   | 8   | 2   | 11  | 1   | 0.253  | 0.34   | 0.67   | 0.167  | 0.971  | 0.089  |
| sof-miRN254-3p | 1   | 1   | 0   | 0   | 19  | 0   | 0.084  | 0.085  | 0      | 0      | 1.678  | 0      |
| sof-miRN254-5p | 110 | 60  | 0   | 0   | 182 | 3   | 9.289  | 5.096  | 0      | 0      | 16.072 | 0.267  |
| sof-miRN255-3p | 20  | 0   | 4   | 15  | 19  | 20  | 1.689  | 0      | 0.335  | 1.253  | 1.678  | 1.779  |
| sof-miRN256-3p | 20  | 0   | 4   | 15  | 23  | 24  | 1.689  | 0      | 0.335  | 1.253  | 2.031  | 2.135  |
| sof-miRN259-3p | 14  | 1   | 7   | 7   | 10  | 12  | 1.182  | 0.085  | 0.587  | 0.585  | 0.883  | 1.067  |
| sof-miRN259-5p | 162 | 26  | 313 | 127 | 229 | 160 | 13.68  | 2.208  | 26.231 | 10.613 | 20.223 | 14.231 |
| sof-miRN260-3p | 14  | 1   | 7   | 7   | 10  | 12  | 1.182  | 0.085  | 0.587  | 0.585  | 0.883  | 1.067  |
| sof-miRN260-5p | 162 | 26  | 313 | 127 | 229 | 160 | 13.68  | 2.208  | 26.231 | 10.613 | 20.223 | 14.231 |
| sof-miRN261-5p | 2   | 23  | 22  | 18  | 22  | 16  | 0.169  | 1.953  | 1.844  | 1.504  | 1.943  | 1.423  |
| sof-miRN262-5p | 2   | 23  | 22  | 18  | 22  | 16  | 0.169  | 1.953  | 1.844  | 1.504  | 1.943  | 1.423  |
| sof-miRN264-5p | 0   | 0   | 0   | 2   | 0   | 0   | 0      | 0      | 0      | 0.167  | 0      | 0      |
| sof-miRN265-5p | 1   | 0   | 19  | 3   | 3   | 2   | 0.084  | 0      | 1.592  | 0.251  | 0.265  | 0.178  |
| sof-miRN266-3p | 1   | 0   | 0   | 0   | 0   | 0   | 0.084  | 0      | 0      | 0      | 0      | 0      |
| sof-miRN267-3p | 5   | 0   | 18  | 1   | 0   | 14  | 0.422  | 0      | 1.509  | 0.084  | 0      | 1.245  |
| sof-miRN267-5p | 28  | 0   | 94  | 9   | 29  | 38  | 2.364  | 0      | 7.878  | 0.752  | 2.561  | 3.38   |
| sof-miRN268-3p | 0   | 0   | 1   | 0   | 0   | 0   | 0      | 0      | 0.084  | 0      | 0      | 0      |
| sof-miRN269-5p | 8   | 8   | 5   | 6   | 5   | 13  | 0.676  | 0.679  | 0.419  | 0.501  | 0.442  | 1.156  |
| sof-miRN271-3p | 26  | 20  | 8   | 8   | 12  | 8   | 2.196  | 1.699  | 0.67   | 0.669  | 1.06   | 0.712  |
| sof-miRN272-5p | 8   | 8   | 14  | 18  | 1   | 15  | 0.676  | 0.679  | 1.173  | 1.504  | 0.088  | 1.334  |
| sof-miRN273-3p | 44  | 2   | 0   | 0   | 2   | 14  | 3.716  | 0.17   | 0      | 0      | 0.177  | 1.245  |
| sof-miRN275-3p | 4   | 2   | 7   | 16  | 1   | 1   | 0.338  | 0.17   | 0.587  | 1.337  | 0.088  | 0.089  |
| sof-miRN276-3p | 33  | 6   | 53  | 19  | 46  | 27  | 2.787  | 0.51   | 4.442  | 1.588  | 4.062  | 2.401  |
| sof-miRN276-5p | 7   | 2   | 14  | 2   | 3   | 9   | 0.591  | 0.17   | 1.173  | 0.167  | 0.265  | 0.8    |
| sof-miRN279-3p | 0   | 1   | 4   | 2   | 0   | 0   | 0      | 0.085  | 0.335  | 0.167  | 0      | 0      |
| sof-miRN282-5p | 3   | 0   | 0   | 0   | 0   | 0   | 0.253  | 0      | 0      | 0      | 0      | 0      |
| sof-miRN283-3p | 2   | 19  | 1   | 2   | 0   | 4   | 0.169  | 1.614  | 0.084  | 0.167  | 0      | 0.356  |
| sof-miRN284-3p | 19  | 35  | 37  | 14  | 15  | 10  | 1.604  | 2.973  | 3.101  | 1.17   | 1.325  | 0.889  |
| sof-miRN285-3p | 65  | 41  | 166 | 102 | 136 | 97  | 5.489  | 3.482  | 13.912 | 8.524  | 12.01  | 8.627  |
| sof-miRN286-3p | 50  | 4   | 44  | 38  | 67  | 24  | 4.222  | 0.34   | 3.687  | 3.175  | 5.917  | 2.135  |
| sof-miRN287-3p | 21  | 0   | 0   | 3   | 0   | 16  | 1.773  | 0      | 0      | 0.251  | 0      | 1.423  |
| sof-miRN288-5p | 20  | 28  | 29  | 32  | 21  | 28  | 1.689  | 2.378  | 2.43   | 2.674  | 1.854  | 2.49   |
| sof-miRN289-5p | 1   | 2   | 13  | 0   | 15  | 0   | 0.084  | 0.17   | 1.089  | 0      | 1.325  | 0      |
| sof-miRN290-5p | 1   | 0   | 59  | 2   | 0   | 0   | 0.084  | 0      | 4.945  | 0.167  | 0      | 0      |
| sof-miRN292-3p | 0   | 0   | 16  | 4   | 0   | 0   | 0      | 0      | 1.341  | 0.334  | 0      | 0      |
| sof-miRN293-3p | 5   | 2   | 12  | 10  | 2   | 13  | 0.422  | 0.17   | 1.006  | 0.836  | 0.177  | 1.156  |
| sof-miRN294-3p | 8   | 7   | 26  | 15  | 8   | 9   | 0.676  | 0.595  | 2.179  | 1.253  | 0.706  | 0.8    |
| sof-miRN296-3p | 5   | 2   | 3   | 3   | 5   | 5   | 0.422  | 0.17   | 0.251  | 0.251  | 0.442  | 0.445  |
| sof-miRN296-5p | 5   | 1   | 1   | 8   | 6   | 2   | 0.422  | 0.085  | 0.084  | 0.669  | 0.53   | 0.178  |
| sof-miRN297-5p | 20  | 3   | 15  | 16  | 16  | 6   | 1.689  | 0.255  | 1.257  | 1.337  | 1.413  | 0.534  |
| sof-miRN298-5p | 0   | 0   | 0   | 1   | 3   | 2   | 0      | 0      | 0      | 0.084  | 0.265  | 0.178  |
| sof-miRN299-5p | 12  | 10  | 13  | 24  | 13  | 17  | 1.013  | 0.849  | 1.089  | 2.006  | 1.148  | 1.512  |
| sof-miRN300-5p | 23  | 12  | 30  | 28  | 15  | 22  | 1.942  | 1.019  | 2.514  | 2.34   | 1.325  | 1.957  |

|                |      |      |      |       |       |       |        |        |        |        |        |        |
|----------------|------|------|------|-------|-------|-------|--------|--------|--------|--------|--------|--------|
| sof-miRN301-5p | 0    | 0    | 2    | 5     | 1     | 12    | 0      | 0      | 0.168  | 0.418  | 0.088  | 1.067  |
| sof-miRN302-3p | 1    | 1    | 0    | 1     | 0     | 2     | 0.084  | 0.085  | 0      | 0.084  | 0      | 0.178  |
| sof-miRN303-5p | 12   | 141  | 7    | 1     | 27    | 17    | 1.013  | 11.975 | 0.587  | 0.084  | 2.384  | 1.512  |
| sof-miRN304-3p | 0    | 0    | 1    | 0     | 1     | 1     | 0      | 0      | 0.084  | 0      | 0.088  | 0.089  |
| sof-miRN305-5p | 32   | 48   | 13   | 25    | 11    | 14    | 2.702  | 4.077  | 1.089  | 2.089  | 0.971  | 1.245  |
| sof-miRN306-3p | 27   | 0    | 36   | 13    | 8     | 19    | 2.28   | 0      | 3.017  | 1.086  | 0.706  | 1.69   |
| sof-miRN307-3p | 4    | 1    | 3    | 1     | 2     | 1     | 0.338  | 0.085  | 0.251  | 0.084  | 0.177  | 0.089  |
| sof-miRN308-3p | 8    | 8    | 26   | 11    | 6     | 11    | 0.676  | 0.679  | 2.179  | 0.919  | 0.53   | 0.978  |
| sof-miRN310-3p | 17   | 24   | 3    | 10    | 9     | 9     | 1.436  | 2.038  | 0.251  | 0.836  | 0.795  | 0.8    |
| sof-miRN312-3p | 7    | 1    | 11   | 6     | 14    | 2     | 0.591  | 0.085  | 0.922  | 0.501  | 1.236  | 0.178  |
| sof-miRN313-5p | 0    | 0    | 0    | 0     | 1     | 1     | 0      | 0      | 0      | 0      | 0.088  | 0.089  |
| sof-miRN314-5p | 0    | 4    | 9    | 9     | 4     | 3     | 0      | 0.34   | 0.754  | 0.752  | 0.353  | 0.267  |
| sof-miRN316-3p | 0    | 0    | 2    | 0     | 12    | 0     | 0      | 0      | 0.168  | 0      | 1.06   | 0      |
| sof-miRN318-3p | 1    | 0    | 2    | 3     | 3     | 2     | 0.084  | 0      | 0.168  | 0.251  | 0.265  | 0.178  |
| sof-miRN319-5p | 1    | 11   | 0    | 35    | 39    | 0     | 0.084  | 0.934  | 0      | 2.925  | 3.444  | 0      |
| sof-miRN320-3p | 0    | 1    | 0    | 0     | 0     | 0     | 0      | 0.085  | 0      | 0      | 0      | 0      |
| sof-miRN320-5p | 4    | 2    | 1    | 0     | 4     | 1     | 0.338  | 0.17   | 0.084  | 0      | 0.353  | 0.089  |
| sof-miRN321-3p | 1    | 0    | 0    | 1     | 0     | 2     | 0.084  | 0      | 0      | 0.084  | 0      | 0.178  |
| sof-miRN322-5p | 6    | 4    | 8    | 2     | 3     | 2     | 0.507  | 0.34   | 0.67   | 0.167  | 0.265  | 0.178  |
| sof-miRN323-3p | 3    | 13   | 3    | 14    | 4     | 3     | 0.253  | 1.104  | 0.251  | 1.17   | 0.353  | 0.267  |
| sof-miRN324-5p | 11   | 7    | 30   | 16    | 22    | 10    | 0.929  | 0.595  | 2.514  | 1.337  | 1.943  | 0.889  |
| sof-miRN325-5p | 117  | 65   | 106  | 101   | 169   | 41    | 9.88   | 5.521  | 8.883  | 8.44   | 14.924 | 3.647  |
| sof-miRN326-3p | 0    | 0    | 0    | 1     | 0     | 0     | 0      | 0      | 0      | 0.084  | 0      | 0      |
| sof-miRN327-5p | 4    | 16   | 67   | 2     | 23    | 0     | 0.338  | 1.359  | 5.615  | 0.167  | 2.031  | 0      |
| sof-miRN328-3p | 1    | 3    | 5    | 0     | 0     | 1     | 0.084  | 0.255  | 0.419  | 0      | 0      | 0.089  |
| sof-miRN329-3p | 1    | 3    | 5    | 0     | 0     | 1     | 0.084  | 0.255  | 0.419  | 0      | 0      | 0.089  |
| sof-miRN330-3p | 6    | 5    | 32   | 21    | 5     | 6     | 0.507  | 0.425  | 2.682  | 1.755  | 0.442  | 0.534  |
| sof-miRN331-3p | 58   | 5    | 44   | 89    | 53    | 27    | 4.898  | 0.425  | 3.687  | 7.437  | 4.68   | 2.401  |
| sof-miRN331-5p | 0    | 0    | 0    | 0     | 1     | 1     | 0      | 0      | 0      | 0      | 0.088  | 0.089  |
| sof-miRN332-5p | 0    | 0    | 15   | 0     | 0     | 0     | 0      | 0      | 1.257  | 0      | 0      | 0      |
| sof-miRN333-3p | 5    | 13   | 3    | 6     | 0     | 4     | 0.422  | 1.104  | 0.251  | 0.501  | 0      | 0.356  |
| sof-miRN334-3p | 7    | 3    | 5    | 14    | 1     | 6     | 0.591  | 0.255  | 0.419  | 1.17   | 0.088  | 0.534  |
| sof-miRN335-5p | 17   | 7    | 4    | 22    | 12    | 34    | 1.436  | 0.595  | 0.335  | 1.838  | 1.06   | 3.024  |
| sof-miRN337-3p | 4    | 1    | 18   | 3     | 7     | 8     | 0.338  | 0.085  | 1.509  | 0.251  | 0.618  | 0.712  |
| sof-miRN338-3p | 4    | 6    | 2    | 9     | 10    | 16    | 0.338  | 0.51   | 0.168  | 0.752  | 0.883  | 1.423  |
| sof-miRN339-5p | 45   | 57   | 164  | 154   | 75    | 62    | 3.8    | 4.841  | 13.744 | 12.869 | 6.623  | 5.514  |
| sof-miRN340-5p | 0    | 0    | 21   | 0     | 0     | 0     | 0      | 0      | 1.76   | 0      | 0      | 0      |
| sof-miRN343-3p | 3776 | 1418 | 1775 | 13864 | 6789  | 4940  | 318.87 | 120.43 | 148.76 | 1158.5 | 599.53 | 439.37 |
| sof-miRN343-5p | 9374 | 3233 | 9886 | 8683  | 10759 | 13511 | 791.6  | 274.59 | 828.51 | 725.59 | 950.11 | 1201.7 |
| sof-miRN344-5p | 7    | 10   | 12   | 1     | 9     | 12    | 0.591  | 0.849  | 1.006  | 0.084  | 0.795  | 1.067  |
| sof-miRN345-5p | 26   | 18   | 39   | 15    | 11    | 18    | 2.196  | 1.529  | 3.268  | 1.253  | 0.971  | 1.601  |
| sof-miRN348-3p | 0    | 0    | 0    | 1     | 0     | 1     | 0      | 0      | 0      | 0.084  | 0      | 0.089  |
| sof-miRN349-3p | 10   | 1    | 1    | 6     | 4     | 0     | 0.844  | 0.085  | 0.084  | 0.501  | 0.353  | 0      |
| sof-miRN350-5p | 1    | 4    | 3    | 10    | 12    | 8     | 0.084  | 0.34   | 0.251  | 0.836  | 1.06   | 0.712  |
| sof-miRN351-3p | 2    | 1    | 3    | 4     | 4     | 0     | 0.169  | 0.085  | 0.251  | 0.334  | 0.353  | 0      |
| sof-miRN351-5p | 1    | 0    | 1    | 0     | 6     | 0     | 0.084  | 0      | 0.084  | 0      | 0.53   | 0      |
| sof-miRN352-5p | 0    | 0    | 0    | 1     | 1     | 0     | 0      | 0      | 0      | 0.084  | 0.088  | 0      |
| sof-miRN353-3p | 2    | 0    | 0    | 0     | 1     | 1     | 0.169  | 0      | 0      | 0      | 0.088  | 0.089  |
| sof-miRN353-5p | 1    | 0    | 0    | 0     | 0     | 0     | 0.084  | 0      | 0      | 0      | 0      | 0      |
| sof-miRN354-5p | 1    | 0    | 0    | 0     | 0     | 0     | 0.084  | 0      | 0      | 0      | 0      | 0      |
| sof-miRN355-5p | 0    | 0    | 1    | 2     | 0     | 0     | 0      | 0      | 0.084  | 0.167  | 0      | 0      |
| sof-miRN356-5p | 8    | 0    | 0    | 12    | 0     | 3     | 0.676  | 0      | 0      | 1.003  | 0      | 0.267  |
| sof-miRN357-5p | 0    | 0    | 0    | 0     | 1     | 0     | 0      | 0      | 0      | 0      | 0.088  | 0      |
| sof-miRN358-3p | 0    | 0    | 1    | 0     | 0     | 0     | 0      | 0      | 0      | 0.084  | 0      | 0      |
| sof-miRN358-5p | 9    | 2    | 18   | 15    | 3     | 8     | 0.76   | 0.17   | 1.509  | 1.253  | 0.265  | 0.712  |
| sof-miRN359-5p | 10   | 7    | 5    | 5     | 9     | 3     | 0.844  | 0.595  | 0.419  | 0.418  | 0.795  | 0.267  |
| sof-miRN360-5p | 36   | 9    | 11   | 3     | 2     | 7     | 3.04   | 0.764  | 0.922  | 0.251  | 0.177  | 0.623  |
| sof-miRN361-3p | 72   | 67   | 314  | 90    | 134   | 22    | 6.08   | 5.69   | 26.315 | 7.521  | 11.833 | 1.957  |
| sof-miRN366-3p | 80   | 105  | 123  | 53    | 60    | 61    | 6.756  | 8.918  | 10.308 | 4.429  | 5.299  | 5.425  |
| sof-miRN367-3p | 14   | 0    | 2    | 20    | 6     | 0     | 1.182  | 0      | 0.168  | 1.671  | 0.53   | 0      |
| sof-miRN368-3p | 22   | 11   | 9    | 20    | 8     | 15    | 1.858  | 0.934  | 0.754  | 1.671  | 0.706  | 1.334  |
| sof-miRN368-5p | 2    | 0    | 0    | 0     | 0     | 0     | 0.169  | 0      | 0      | 0      | 0      | 0      |
| sof-miRN369-3p | 15   | 12   | 5    | 24    | 24    | 5     | 1.267  | 1.019  | 0.419  | 2.006  | 2.119  | 0.445  |
| sof-miRN371-3p | 2    | 2    | 10   | 3     | 1     | 0     | 0.169  | 0.17   | 0.838  | 0.251  | 0.088  | 0      |
| sof-miRN371-5p | 1    | 0    | 3    | 0     | 5     | 6     | 0.084  | 0      | 0.251  | 0      | 0.442  | 0.534  |
| sof-miRN372-3p | 37   | 43   | 99   | 44    | 26    | 26    | 3.124  | 3.652  | 8.297  | 3.677  | 2.296  | 2.312  |
| sof-miRN373-5p | 37   | 5    | 54   | 19    | 8     | 25    | 3.124  | 0.425  | 4.526  | 1.588  | 0.706  | 2.224  |
| sof-miRN374-5p | 1    | 0    | 1    | 0     | 1     | 1     | 0.084  | 0      | 0.084  | 0      | 0.088  | 0.089  |
| sof-miRN375-3p | 37   | 0    | 308  | 14    | 55    | 77    | 3.124  | 0      | 25.812 | 1.17   | 4.857  | 6.848  |
| sof-miRN376-5p | 0    | 1    | 0    | 2     | 2     | 0     | 0      | 0.085  | 0      | 0.167  | 0.177  | 0      |
| sof-miRN377-5p | 12   | 121  | 16   | 10    | 27    | 20    | 1.013  | 10.277 | 1.341  | 0.836  | 2.384  | 1.779  |
| sof-miRN378-3p | 2    | 3    | 12   | 0     | 1     | 4     | 0.169  | 0.255  | 1.006  | 0      | 0.088  | 0.356  |
| sof-miRN379-5p | 837  | 229  | 1433 | 669   | 577   | 806   | 70.681 | 19.45  | 120.1  | 55.904 | 50.954 | 71.686 |
| sof-miRN381-3p | 37   | 57   | 71   | 61    | 56    | 36    | 3.124  | 4.841  | 5.95   | 5.097  | 4.945  | 3.202  |
| sof-miRN382-5p | 3    | 0    | 0    | 0     | 2     | 1     | 0.253  | 0      | 0      | 0      | 0.177  | 0.089  |
| sof-miRN383-3p | 41   | 32   | 11   | 19    | 20    | 3     | 3.462  | 2.718  | 0.922  | 1.588  | 1.766  | 0.267  |
| sof-miRN385-3p | 12   | 26   | 47   | 44    | 52    | 36    | 1.013  | 2.208  | 3.939  | 3.677  | 4.592  | 3.202  |
| sof-miRN386-5p | 27   | 42   | 16   | 12    | 12    | 16    | 2.28   | 3.567  | 1.341  | 1.003  | 1.06   | 1.423  |
| sof-miRN389-5p | 0    | 2    | 0    | 0     | 0     | 0     | 0      | 0.17   | 0      | 0      | 0      | 0      |
| sof-miRN390-3p | 3    | 1    | 2    | 1     | 0     | 1     | 0.253  | 0.085  | 0.168  | 0.084  | 0      | 0.089  |
| sof-miRN391-3p | 3    | 5    | 4    | 3     | 1     | 3     | 0.253  | 0.425  | 0.335  | 0.251  | 0.088  | 0.267  |
| sof-miRN392-3p | 3    | 15   | 4    | 0     | 28    | 13    | 0.253  | 1.274  | 0.335  | 0      | 2.473  | 1.156  |
| sof-miRN393-3p | 5    | 5    | 23   | 2     | 0     | 5     | 0.422  | 0.425  | 1.928  | 0.167  | 0      | 0.445  |
| sof-miRN394-3p | 2    | 1    | 14   | 3     | 14    | 3     | 0.169  | 0.085  | 1.173  | 0.251  | 1.236  | 0.267  |
| sof-miRN395-3p | 4    | 0    | 0    | 1     | 1     | 3     | 0.338  | 0      | 0      | 0.084  | 0.088  | 0.267  |
| sof-miRN396-3p | 1305 | 1197 | 1318 | 1565  | 1908  | 1092  | 110.2  | 101.66 | 110.46 | 130.78 | 168.49 | 97.123 |
| sof-miRN397-5p | 40   | 24   | 20   | 167   | 82    | 106   | 3.378  | 2.038  | 1.676  | 13.955 | 7.241  | 9.428  |

|                |     |    |    |    |     |    |       |       |       |       |        |       |
|----------------|-----|----|----|----|-----|----|-------|-------|-------|-------|--------|-------|
| sof-miRN398-3p | 29  | 20 | 29 | 22 | 28  | 10 | 2.449 | 1.699 | 2.43  | 1.838 | 2.473  | 0.889 |
| sof-miRN401-3p | 0   | 0  | 0  | 0  | 3   | 0  | 0     | 0     | 0     | 0     | 0.265  | 0     |
| sof-miRN402-3p | 4   | 12 | 9  | 24 | 22  | 14 | 0.338 | 1.019 | 0.754 | 2.006 | 1.943  | 1.245 |
| sof-miRN403-3p | 0   | 0  | 0  | 2  | 0   | 0  | 0     | 0     | 0     | 0.167 | 0      | 0     |
| sof-miRN405-5p | 19  | 49 | 17 | 39 | 43  | 18 | 1.604 | 4.162 | 1.425 | 3.259 | 3.797  | 1.601 |
| sof-miRN406-5p | 1   | 2  | 0  | 13 | 4   | 4  | 0.084 | 0.17  | 0     | 1.086 | 0.353  | 0.356 |
| sof-miRN407-3p | 0   | 0  | 0  | 2  | 0   | 0  | 0     | 0     | 0     | 0.167 | 0      | 0     |
| sof-miRN408-3p | 1   | 1  | 0  | 0  | 19  | 0  | 0.084 | 0.085 | 0     | 0     | 1.678  | 0     |
| sof-miRN408-5p | 110 | 60 | 0  | 0  | 182 | 3  | 9.289 | 5.096 | 0     | 0     | 16.072 | 0.267 |

**Table S2. KEGG pathway enrichment analysis for differentially expressed miRNAs.**

| Group                                       | Pathway                                                   | ID      | Gene number | p-value  | q-value  | miRNA                                                                                                                                                              |
|---------------------------------------------|-----------------------------------------------------------|---------|-------------|----------|----------|--------------------------------------------------------------------------------------------------------------------------------------------------------------------|
| Glycan biosynthesis and metabolism          | Glycosylphosphatidylinositol(GPI)-anchor biosynthesis     | ko00563 | 9           | 7.83E-06 | 1.20E-03 | sof-miR393-3p,sof-miR393-5p                                                                                                                                        |
| Cell growth and death                       | Meiosis - yeast                                           | ko04113 | 9           | 2.09E-05 | 3.20E-03 | sof-miRN245-5p,sof-miR5384-3p                                                                                                                                      |
| Signal transduction                         | Plant hormone signal transduction                         | ko04075 | 22          | 0.000218 | 3.34E-02 | sof-miR171c-3p,sof-miR393-5p,sof-miR5384-3p,sof-miR167a-3p,sof-miRN141-3p                                                                                          |
| Cell growth and death                       | Oocyte meiosis                                            | ko04114 | 9           | 0.0003   | 4.59E-02 | sof-miR5384-3p,sof-miRN245-5p                                                                                                                                      |
| Endocrine system                            | Adipocytokine signaling pathway                           | ko04920 | 4           | 0.002303 | 3.52E-01 | sof-miRN141-3p,sof-miR166d-5p                                                                                                                                      |
| Transport and catabolism                    | Regulation of autophagy                                   | ko04140 | 4           | 0.002445 | 3.74E-01 | sof-miRN141-3p,sof-miRN245-5p                                                                                                                                      |
| Cell growth and death                       | Cell cycle - yeast                                        | ko04111 | 7           | 0.002478 | 3.79E-01 | sof-miRN245-5p                                                                                                                                                     |
| Endocrine system                            | Oxytocin signaling pathway                                | ko04921 | 6           | 0.004325 | 6.62E-01 | sof-miRN141-3p,sof-miR166d-5p,sof-miR5384-3p                                                                                                                       |
| Endocrine system                            | Regulation of lipolysis in adipocytes                     | ko04923 | 2           | 0.007803 | 1.00E+00 | sof-miR5384-3p                                                                                                                                                     |
| Endocrine system                            | Ovarian steroidogenesis                                   | ko04913 | 2           | 0.007803 | 1.00E+00 | sof-miR5384-3p                                                                                                                                                     |
| Sensory system                              | Taste transduction                                        | ko04742 | 2           | 0.009448 | 1.00E+00 | sof-miR5384-3p                                                                                                                                                     |
| Lipid metabolism                            | Fatty acid elongation                                     | ko00062 | 3           | 0.01792  | 1.00E+00 | sof-miR408-3p                                                                                                                                                      |
| Amino acid metabolism                       | Tryptophan metabolism                                     | ko00380 | 4           | 0.01795  | 1.00E+00 | sof-miRN164-5p,sof-miR167a-3p                                                                                                                                      |
| Glycan biosynthesis and metabolism          | Glycosphingolipid biosynthesis - globo series             | ko00603 | 2           | 0.02642  | 1.00E+00 | sof-miR5384-3p                                                                                                                                                     |
| Biosynthesis of other secondary metabolites | Betalain biosynthesis                                     | ko00965 | 1           | 0.02717  | 1.00E+00 | sof-miR408-3p                                                                                                                                                      |
| Excretory system                            | Vasopressin-regulated water reabsorption                  | ko04962 | 2           | 0.03796  | 1.00E+00 | sof-miR5384-3p                                                                                                                                                     |
| Lipid metabolism                            | Biosynthesis of unsaturated fatty acids                   | ko01040 | 3           | 0.03808  | 1.00E+00 | sof-miR408-3p                                                                                                                                                      |
| Excretory system                            | Endocrine and other factor-regulated calcium reabsorption | ko04961 | 2           | 0.04217  | 1.00E+00 | sof-miR5384-3p                                                                                                                                                     |
| Nervous system                              | Cholinergic synapse                                       | ko04725 | 2           | 0.04217  | 1.00E+00 | sof-miR5384-3p                                                                                                                                                     |
| Nervous system                              | Serotonergic synapse                                      | ko04726 | 2           | 0.04217  | 1.00E+00 | sof-miR5384-3p                                                                                                                                                     |
| Signal transduction                         | Hedgehog signaling pathway                                | ko04340 | 2           | 0.04992  | 1.00E+00 | sof-miR5384-3p                                                                                                                                                     |
| Infectious diseases: Parasitic              | Amoebiasis                                                | ko05146 | 2           | 0.05339  | 1.00E+00 | sof-miR5384-3p                                                                                                                                                     |
| Signal transduction                         | AMPK signaling pathway                                    | ko04152 | 4           | 0.06458  | 1.00E+00 | sof-miR166d-5p,sof-miRN141-3p                                                                                                                                      |
| Biosynthesis of other secondary metabolites | Tropane, piperidine and pyridine alkaloid biosynthesis    | ko00960 | 2           | 0.07062  | 1.00E+00 | sof-miRN167-3p                                                                                                                                                     |
| Carbohydrate metabolism                     | Galactose metabolism                                      | ko00052 | 4           | 0.07405  | 1.00E+00 | sof-miR319-3p                                                                                                                                                      |
| Environmental adaptation                    | Circadian rhythm                                          | ko04710 | 2           | 0.08525  | 1.00E+00 | sof-miRN141-3p                                                                                                                                                     |
| Cell growth and death                       | Cell cycle                                                | ko04110 | 7           | 0.09359  | 1.00E+00 | sof-miRN245-5p                                                                                                                                                     |
| Sensory system                              | Olfactory transduction                                    | ko04740 | 2           | 0.1007   | 1.00E+00 | sof-miR5384-3p                                                                                                                                                     |
| Nervous system                              | Retrograde endocannabinoid signaling                      | ko04723 | 2           | 0.1021   | 1.00E+00 | sof-miR5384-3p                                                                                                                                                     |
| Infectious diseases: Parasitic              | African trypanosomiasis                                   | ko05143 | 1           | 0.1044   | 1.00E+00 | sof-miR167a-3p                                                                                                                                                     |
| Cellular community                          | Gap junction                                              | ko04540 | 2           | 0.1079   | 1.00E+00 | sof-miR5384-3p                                                                                                                                                     |
| Endocrine system                            | Progesterone-mediated oocyte maturation                   | ko04914 | 3           | 0.1087   | 1.00E+00 | sof-miR5384-3p,sof-miRN014-3p                                                                                                                                      |
| Endocrine system                            | Aldosterone synthesis and secretion                       | ko04925 | 2           | 0.1094   | 1.00E+00 | sof-miR5384-3p                                                                                                                                                     |
| Sensory system                              | Inflammatory mediator regulation of TRP channels          | ko04750 | 2           | 0.1168   | 1.00E+00 | sof-miR5384-3p                                                                                                                                                     |
| Environmental adaptation                    | Circadian entrainment                                     | ko04713 | 2           | 0.1414   | 1.00E+00 | sof-miR5384-3p                                                                                                                                                     |
| Metabolism of terpenoids and polyketides    | Zeatin biosynthesis                                       | ko00908 | 3           | 0.1516   | 1.00E+00 | sof-miR395b-5p,sof-miR395c-5p,sof-miR395a-3p                                                                                                                       |
| Global and overview maps                    | Fatty acid metabolism                                     | ko01212 | 3           | 0.1527   | 1.00E+00 | sof-miR408-3p                                                                                                                                                      |
| Environmental adaptation                    | Plant-pathogen interaction                                | ko04626 | 20          | 0.1642   | 1.00E+00 | sof-miR166e-5p,sof-miR167b-5p,sof-miR393-3p,sof-miR159-5p,sof-miRN014-3p,sof-miRN141-3p,sof-miR396b-5p,sof-miR396a-5p,sof-miR167c-5p,sof-miR167a-5p,sof-miRN245-5p |
| Endocrine system                            | Estrogen signaling pathway                                | ko04915 | 3           | 0.1692   | 1.00E+00 | sof-miRN014-3p,sof-miR5384-3p                                                                                                                                      |
| Nervous system                              | GABAergic synapse                                         | ko04727 | 2           | 0.1717   | 1.00E+00 | sof-miR5384-3p                                                                                                                                                     |
| Replication and repair                      | Homologous recombination                                  | ko03440 | 6           | 0.1827   | 1.00E+00 | sof-miR167b-5p,sof-miR395b-5p,sof-miRN303-5p,sof-miR395c-5p,sof-miR408-3p,sof-miR395a-3p,sof-miR167c-5p                                                            |
| Carbohydrate metabolism                     | Starch and sucrose metabolism                             | ko00500 | 7           | 0.2055   | 1.00E+00 | sof-miR5384-3p,sof-miRN141-3p,sof-miR319-3p                                                                                                                        |
| Endocrine system                            | Melanogenesis                                             | ko04916 | 2           | 0.2114   | 1.00E+00 | sof-miR5384-3p                                                                                                                                                     |
| Circulatory system                          | Vascular smooth muscle contraction                        | ko04270 | 2           | 0.2215   | 1.00E+00 | sof-miR5384-3p                                                                                                                                                     |
| Amino acid metabolism                       | Arginine and proline metabolism                           | ko00330 | 2           | 0.2417   | 1.00E+00 | sof-miRN141-3p,sof-miR167c-5p,sof-miR167b-5p                                                                                                                       |
| Nervous system                              | Dopaminergic synapse                                      | ko04728 | 2           | 0.2603   | 1.00E+00 | sof-miR5384-3p                                                                                                                                                     |
| Endocrine and metabolic diseases            | Insulin resistance                                        | ko04931 | 2           | 0.262    | 1.00E+00 | sof-miRN141-3p                                                                                                                                                     |
| Endocrine and metabolic diseases            | Non-alcoholic fatty liver disease (NAFLD)                 | ko04932 | 2           | 0.2671   | 1.00E+00 | sof-miRN141-3p                                                                                                                                                     |



|                                             |                                                       |         |   |        |          |                                                                                                                                    |
|---------------------------------------------|-------------------------------------------------------|---------|---|--------|----------|------------------------------------------------------------------------------------------------------------------------------------|
| Circulatory system                          | Adrenergic signaling in cardiomyocytes                | ko04261 | 2 | 0.2756 | 1.00E+00 | sof-miR5384-3p                                                                                                                     |
| Folding, sorting and degradation            | RNA degradation                                       | ko03018 | 8 | 0.2803 | 1.00E+00 | sof-miRN003-5p,sof-miRN267-5p,sof-miRN145-3p,sof-miR5384-3p,sof-miR408-3p,sof-miR393-3p,sof-miR166g-5p                             |
| Nervous system                              | Long-term potentiation                                | ko04720 | 2 | 0.2992 | 1.00E+00 | sof-miR5384-3p                                                                                                                     |
| Signal transduction                         | Calcium signaling pathway                             | ko04020 | 2 | 0.3026 | 1.00E+00 | sof-miR5384-3p                                                                                                                     |
| Endocrine system                            | GnRH signaling pathway                                | ko04912 | 2 | 0.3094 | 1.00E+00 | sof-miR5384-3p                                                                                                                     |
| Translation                                 | RNA transport                                         | ko03013 | 9 | 0.3166 | 1.00E+00 | sof-miR156-3p,sof-miR395a-3p,sof-miR166g-5p,sof-miR166e-5p,sof-miR145-3p,sof-miR395c-5p,sof-miR395b-5p,sof-miR408-3p,sof-miR156-5p |
| Nervous system                              | Glutamatergic synapse                                 | ko04724 | 2 | 0.3178 | 1.00E+00 | sof-miR5384-3p                                                                                                                     |
| Replication and repair                      | Mismatch repair                                       | ko03430 | 2 | 0.384  | 1.00E+00 | sof-miRN303-5p,sof-miR408-3p                                                                                                       |
| Carbohydrate metabolism                     | Inositol phosphate metabolism                         | ko00562 | 2 | 0.3872 | 1.00E+00 | sof-miRN141-3p,sof-miR166g-5p                                                                                                      |
| Infectious diseases: Bacterial              | Vibrio cholerae infection                             | ko05110 | 2 | 0.3872 | 1.00E+00 | sof-miR5384-3p                                                                                                                     |
| Translation                                 | Ribosome biogenesis in eukaryotes                     | ko03008 | 7 | 0.4035 | 1.00E+00 | sof-miRN145-3p,sof-miRN267-5p,sof-miR319-3p,sof-miRN003-5p,sof-miR5384-3p,sof-miR166g-5p,sof-miR393-3p                             |
| Signal transduction                         | cAMP signaling pathway                                | ko04024 | 2 | 0.4192 | 1.00E+00 | sof-miR5384-3p                                                                                                                     |
| Lipid metabolism                            | Glycerolipid metabolism                               | ko00561 | 2 | 0.4427 | 1.00E+00 | sof-miR408-3p                                                                                                                      |
| Replication and repair                      | DNA replication                                       | ko03030 | 2 | 0.4686 | 1.00E+00 | sof-miRN303-5p,sof-miR408-3p                                                                                                       |
| Folding, sorting and degradation            | Proteasome                                            | ko03050 | 1 | 0.4797 | 1.00E+00 | sof-miR5384-3p                                                                                                                     |
| Replication and repair                      | Nucleotide excision repair                            | ko03420 | 2 | 0.5446 | 1.00E+00 | sof-miRN303-5p,sof-miR395b-5p,sof-miR395c-5p,sof-miR395a-3p                                                                        |
| Signal transduction                         | Phosphatidylinositol signaling system                 | ko04070 | 2 | 0.5568 | 1.00E+00 | sof-miR166g-5p,sof-miRN141-3p                                                                                                      |
| Xenobiotics biodegradation and metabolism   | Polycyclic aromatic hydrocarbon degradation           | ko00624 | 1 | 0.5907 | 1.00E+00 | sof-miR408-3p                                                                                                                      |
| Metabolism of cofactors and vitamins        | Ubiquinone and other terpenoid-quinone biosynthesis   | ko00130 | 1 | 0.6145 | 1.00E+00 | sof-miRN167-3p                                                                                                                     |
| Xenobiotics biodegradation and metabolism   | Bisphenol degradation                                 | ko00363 | 1 | 0.6251 | 1.00E+00 | sof-miR408-3p                                                                                                                      |
| Metabolism of terpenoids and polyketides    | Limonene and pinene degradation                       | ko00903 | 1 | 0.6319 | 1.00E+00 | sof-miR408-3p                                                                                                                      |
| Energy metabolism                           | Photosynthesis                                        | ko00195 | 1 | 0.6404 | 1.00E+00 | sof-miR5384-3p,sof-miRN141-3p                                                                                                      |
| Xenobiotics biodegradation and metabolism   | Aminobenzoate degradation                             | ko00627 | 1 | 0.6404 | 1.00E+00 | sof-miR408-3p                                                                                                                      |
| Membrane transport                          | ABC transporters                                      | ko02010 | 2 | 0.6456 | 1.00E+00 | sof-miR156-3p,sof-miR5384-3p                                                                                                       |
| Carbohydrate metabolism                     | Ascorbate and aldarate metabolism                     | ko00053 | 1 | 0.6766 | 1.00E+00 | sof-miR408-3p                                                                                                                      |
| Signal transduction                         | Phospholipase D signaling pathway                     | ko04072 | 1 | 0.6955 | 1.00E+00 | sof-miR166g-5p                                                                                                                     |
| Cell motility                               | Regulation of actin cytoskeleton                      | ko04810 | 1 | 0.7106 | 1.00E+00 | sof-miR166g-5p                                                                                                                     |
| Carbohydrate metabolism                     | Pyruvate metabolism                                   | ko00620 | 1 | 0.7275 | 1.00E+00 | sof-miRN245-5p                                                                                                                     |
| Lipid metabolism                            | Glycerophospholipid metabolism                        | ko00564 | 2 | 0.7381 | 1.00E+00 | sof-miR408-3p                                                                                                                      |
| Infectious diseases: Parasitic              | Toxoplasmosis                                         | ko05145 | 4 | 0.7558 | 1.00E+00 | sof-miRN141-3p,sof-miR166e-5p                                                                                                      |
| Carbohydrate metabolism                     | Pentose and glucuronate interconversions              | ko00040 | 1 | 0.7584 | 1.00E+00 | sof-miRN141-3p                                                                                                                     |
| Folding, sorting and degradation            | Protein processing in endoplasmic reticulum           | ko04141 | 3 | 0.7656 | 1.00E+00 | sof-miRN014-3p                                                                                                                     |
| Signal transduction                         | FoxO signaling pathway                                | ko04068 | 2 | 0.7738 | 1.00E+00 | sof-miRN141-3p                                                                                                                     |
| Carbohydrate metabolism                     | Glyoxylate and dicarboxylate metabolism               | ko00630 | 1 | 0.7788 | 1.00E+00 | sof-miR5384-3p                                                                                                                     |
| Biosynthesis of other secondary metabolites | Flavonoid biosynthesis                                | ko00941 | 1 | 0.8205 | 1.00E+00 | sof-miR5384-3p                                                                                                                     |
| Metabolism of other amino acids             | Cyanoamino acid metabolism                            | ko00460 | 1 | 0.8205 | 1.00E+00 | sof-miRN003-5p                                                                                                                     |
| Metabolism of terpenoids and polyketides    | Terpenoid backbone biosynthesis                       | ko00900 | 1 | 0.8262 | 1.00E+00 | sof-miRN141-3p                                                                                                                     |
| Biosynthesis of other secondary metabolites | Stilbenoid, diarylheptanoid and gingerol biosynthesis | ko00945 | 1 | 0.8286 | 1.00E+00 | sof-miR408-3p                                                                                                                      |
| Infectious diseases: Viral                  | HTLV-I infection                                      | ko05166 | 2 | 0.8426 | 1.00E+00 | sof-miR5384-3p                                                                                                                     |
| Transport and catabolism                    | Peroxisome                                            | ko04146 | 1 | 0.8438 | 1.00E+00 | sof-miR5384-3p                                                                                                                     |
| Cell growth and death                       | Apoptosis                                             | ko04210 | 4 | 0.8473 | 1.00E+00 | sof-miR5384-3p,sof-miR166e-5p                                                                                                      |
| Infectious diseases: Viral                  | Measles                                               | ko05162 | 3 | 0.864  | 1.00E+00 | sof-miR395a-3p,sof-miR166e-5p,sof-miR395c-5p,sof-miR395b-5p                                                                        |
| Translation                                 | mRNA surveillance pathway                             | ko03015 | 2 | 0.8762 | 1.00E+00 | sof-miR166g-5p,sof-miRN145-3p                                                                                                      |
| Transport and catabolism                    | Lysosome                                              | ko04142 | 1 | 0.8808 | 1.00E+00 | sof-miRN245-5p                                                                                                                     |
| Transport and catabolism                    | Endocytosis                                           | ko04144 | 1 | 0.8862 | 1.00E+00 | sof-miR166g-5p                                                                                                                     |
| Infectious diseases: Viral                  | Epstein-Barr virus infection                          | ko05169 | 4 | 0.8979 | 1.00E+00 | sof-miRN245-5p,sof-miR5384-3p,sof-miRN003-5p                                                                                       |

|                                             |                                              |         |    |        |          |                                                                                                                                                                                                                                             |
|---------------------------------------------|----------------------------------------------|---------|----|--------|----------|---------------------------------------------------------------------------------------------------------------------------------------------------------------------------------------------------------------------------------------------|
| Biosynthesis of other secondary metabolites | Phenylpropanoid biosynthesis                 | ko00940 | 2  | 0.9019 | 1.00E+00 | sof-miR5384-3p                                                                                                                                                                                                                              |
| Infectious diseases: Parasitic              | Leishmaniasis                                | ko05140 | 2  | 0.9147 | 1.00E+00 | sof-miR166e-5p                                                                                                                                                                                                                              |
| Carbohydrate metabolism                     | Amino sugar and nucleotide sugar metabolism  | ko00520 | 1  | 0.9152 | 1.00E+00 | sof-miR5384-3p                                                                                                                                                                                                                              |
| Infectious diseases: Parasitic              | Chagas disease (American trypanosomiasis)    | ko05142 | 2  | 0.9316 | 1.00E+00 | sof-miR166e-5p                                                                                                                                                                                                                              |
| Infectious diseases: Bacterial              | Pertussis                                    | ko05133 | 2  | 0.9446 | 1.00E+00 | sof-miR166e-5p                                                                                                                                                                                                                              |
| Transcription                               | RNA polymerase                               | ko03020 | 2  | 0.9465 | 1.00E+00 | sof-miRN003-5p,sof-miRN245-5p                                                                                                                                                                                                               |
| Global and overview maps                    | Metabolic pathways                           | ko01100 | 38 | 0.9513 | 1.00E+00 | sof-miR395a-3p,sof-miR319-3p,sof-miR167c-5p,sof-miRN141-3p,sof-miRN003-5p,sof-miRN245-5p,sof-miR166g-5p,sof-miR167b-5p,sof-miR167a-3p,sof-miR395b-5p,sof-miR395c-5p,sof-miR5384-3p,sof-miR393-5p,sof-miRN167-3p,sof-miR408-3p,sof-miR393-3p |
| Nervous system                              | Neurotrophin signaling pathway               | ko04722 | 2  | 0.955  | 1.00E+00 | sof-miR166e-5p                                                                                                                                                                                                                              |
| Folding, sorting and degradation            | Ubiquitin mediated proteolysis               | ko04120 | 1  | 0.9565 | 1.00E+00 | sof-miR396c-3p,sof-miRN375-3p,sof-miR396a-5p,sof-miR396b-5p                                                                                                                                                                                 |
| Replication and repair                      | Fanconi anemia pathway                       | ko03460 | 1  | 0.9683 | 1.00E+00 | sof-miRN303-5p                                                                                                                                                                                                                              |
| Infectious diseases: Viral                  | Influenza A                                  | ko05164 | 2  | 0.9701 | 1.00E+00 | sof-miR166e-5p                                                                                                                                                                                                                              |
| Infectious diseases: Bacterial              | Tuberculosis                                 | ko05152 | 2  | 0.9786 | 1.00E+00 | sof-miR166e-5p                                                                                                                                                                                                                              |
| Nucleotide metabolism                       | Pyrimidine metabolism                        | ko00240 | 2  | 0.989  | 1.00E+00 | sof-miRN245-5p,sof-miRN003-5p                                                                                                                                                                                                               |
| Global and overview maps                    | Microbial metabolism in diverse environments | ko01120 | 3  | 0.9918 | 1.00E+00 | sof-miR5384-3p,sof-miR408-3p,sof-miRN141-3p                                                                                                                                                                                                 |
| Nucleotide metabolism                       | Purine metabolism                            | ko00230 | 2  | 0.9921 | 1.00E+00 | sof-miRN245-5p,sof-miRN003-5p                                                                                                                                                                                                               |
| Global and overview maps                    | Carbon metabolism                            | ko01200 | 1  | 0.9935 | 1.00E+00 | sof-miR5384-3p                                                                                                                                                                                                                              |
| Global and overview maps                    | Biosynthesis of secondary metabolites        | ko01110 | 17 | 0.9961 | 1.00E+00 | sof-miRN003-5p,sof-miR395c-5p,sof-miR395b-5p,sof-miR395a-3p,sof-miR408-3p,sof-miRN167-3p,sof-miR5384-3p                                                                                                                                     |
| Global and overview maps                    | Biosynthesis of antibiotics                  | ko01130 | 2  | 0.9994 | 1.00E+00 | sof-miR5384-3p,sof-miRN141-3p                                                                                                                                                                                                               |

Table S3. SNPs in sugarcane miRNAs.

| miRNA           | Position | Type | B1         |         | B2         |         | Q1         |         | Q2         |         | T1         |         | T2         |         |
|-----------------|----------|------|------------|---------|------------|---------|------------|---------|------------|---------|------------|---------|------------|---------|
|                 |          |      | miRNP read | Percent | miRNP read | Percent | miRNP read | Percent | miRNP read | Percent | miRNP read | Percent | miRNP read | Percent |
| sof-miR156-3p   | 5        | A>G  | 7          | 63.64%  | 6          | 37.50%  | 33         | 32.35%  | 3          | 0.00%   | 0          | 0.00%   | 0          | 0.00%   |
| sof-miR156-5p   | 15       | T>C  | 90         | 18.07%  | 150        | 5.47%   | 694        | 4.52%   | 178        | 19.80%  | 90         | 9.32%   | 7          | 3.55%   |
| sof-miR166a-3p  | 12       | T>C  | 660        | 0.04%   | 392        | 0.05%   | 263        | 0.04%   | 1303       | 1.89%   | 3845       | 4.82%   | 535        | 0.11%   |
| sof-miR166b-5p  | 8        | T>G  | 265        | 53.54%  | 145        | 22.45%  | 0          | 0.00%   | 259        | 48.41%  | 73         | 17.06%  | 42         | 64.62%  |
| sof-miR166b-5p  | 12       | G>A  | 5          | 1.01%   | 5          | 0.77%   | 0          | 0.00%   | 0          | 0.00%   | 25         | 5.84%   | 0          | 0.00%   |
| sof-miR166c-3p  | 15       | T>C  | 685        | 0.04%   | 413        | 0.04%   | 334        | 0.04%   | 1261       | 1.81%   | 3892       | 4.36%   | 542        | 0.11%   |
| sof-miR166d-3p  | 12       | T>C  | 681        | 0.04%   | 410        | 0.04%   | 332        | 0.04%   | 1260       | 1.82%   | 3886       | 4.42%   | 537        | 0.11%   |
| sof-miR166f-3p  | 12       | T>C  | 729        | 0.04%   | 580        | 0.05%   | 359        | 0.04%   | 13131      | 1.57%   | 38747      | 3.94%   | 544        | 0.11%   |
| sof-miR166g-3p  | 16       | A>T  | 372        | 0.94%   | 263        | 1.14%   | 219        | 0.90%   | 294        | 0.90%   | 330        | 1.79%   | 171        | 1.32%   |
| sof-miR172-5p   | 9        | A>G  | 6          | 3.00%   | 78         | 50.65%  | 15         | 34.09%  | 0          | 0.00%   | 40         | 31.25%  | 0          | 0.00%   |
| sof-miR2275-5p  | 8        | G>T  | 0          | 0.00%   | 0          | 0.00%   | 0          | 0.00%   | 0          | 0.00%   | 27         | 27.55%  | 13         | 39.39%  |
| sof-miR395a-3p  | 8        | T>C  | 0          | 0.00%   | 11         | 3.57%   | 0          | 0.00%   | 0          | 0.00%   | 0          | 0.00%   | 0          | 0.00%   |
| sof-miR395a-3p  | 13       | G>A  | 46         | 56.79%  | 130        | 42.21%  | 13         | 14.13%  | 7          | 25.93%  | 299        | 71.36%  | 14         | 43.75%  |
| sof-miR395a-3p  | 14       | G>T  | 12         | 14.81%  | 26         | 8.44%   | 12         | 13.04%  | 0          | 0.00%   | 16         | 3.82%   | 0          | 0.00%   |
| sof-miR395a-5p  | 12       | A>G  | 0          | 0.00%   | 0          | 0.00%   | 0          | 0.00%   | 0          | 0.00%   | 13         | 41.94%  | 0          | 0.00%   |
| sof-miR395b-3p  | 8        | T>G  | 0          | 0.00%   | 0          | 0.00%   | 0          | 0.00%   | 0          | 0.00%   | 13         | 65.00%  | 0          | 0.00%   |
| sof-miR395b-3p  | 8        | T>C  | 0          | 0.00%   | 11         | 3.57%   | 0          | 0.00%   | 0          | 0.00%   | 0          | 0.00%   | 0          | 0.00%   |
| sof-miR395b-5p  | 13       | G>A  | 46         | 56.79%  | 130        | 42.21%  | 13         | 14.44%  | 7          | 25.93%  | 299        | 73.63%  | 14         | 43.75%  |
| sof-miR395b-5p  | 14       | G>T  | 12         | 14.81%  | 26         | 8.44%   | 12         | 13.33%  | 0          | 0.00%   | 16         | 3.94%   | 0          | 0.00%   |
| sof-miR395c-5p  | 8        | T>C  | 0          | 0.00%   | 11         | 3.57%   | 0          | 0.00%   | 0          | 0.00%   | 0          | 0.00%   | 0          | 0.00%   |
| sof-miR395c-5p  | 13       | G>A  | 46         | 56.79%  | 130        | 42.21%  | 13         | 14.13%  | 7          | 25.93%  | 299        | 71.36%  | 14         | 46.67%  |
| sof-miR395c-5p  | 14       | G>T  | 12         | 14.81%  | 26         | 8.44%   | 12         | 13.04%  | 0          | 0.00%   | 16         | 3.82%   | 0          | 0.00%   |
| sof-miR396b-3p  | 15       | A>T  | 0          | 0.00%   | 0          | 0.00%   | 0          | 0.00%   | 0          | 0.00%   | 0          | 0.00%   | 0          | 0.00%   |
| sof-miR554a-3p  | 15       | G>C  | 0          | 0.00%   | 0          | 0.00%   | 15         | 48.48%  | 0          | 0.00%   | 0          | 0.00%   | 0          | 0.00%   |
| sof-miR554b-3p  | 10       | A>T  | 1035       | 85.05%  | 1798       | 93.99%  | 0          | 0.00%   | 0          | 0.00%   | 764        | 91.50%  | 283        | 83.48%  |
| sof-miR556a-3p  | 16       | T>G  | 80         | 6.57%   | 73         | 3.82%   | 43         | 27.04%  | 96         | 45.93%  | 39         | 4.67%   | 10         | 2.95%   |
| sof-miR556b-5p  | 6        | A>G  | 5          | 2.44%   | 0          | 0.00%   | 19         | 4.97%   | 12         | 3.68%   | 7          | 1.51%   | 0          | 0.00%   |
| sof-miR556b-5p  | 10       | G>T  | 34         | 16.59%  | 156        | 36.11%  | 64         | 16.75%  | 31         | 9.51%   | 124        | 26.78%  | 9          | 12.33%  |
| sof-miR556b-5p  | 11       | A>T  | 0          | 0.00%   | 15         | 3.47%   | 9          | 2.56%   | 9          | 2.76%   | 0          | 0.00%   | 0          | 0.00%   |
| sof-miR556b-5p  | 12       | C>T  | 0          | 0.00%   | 9          | 2.08%   | 8          | 2.09%   | 20         | 6.14%   | 22         | 4.75%   | 7          | 9.59%   |
| sof-miR556d-3p  | 6        | T>C  | 10         | 25.00%  | 0          | 0.00%   | 21         | 28.38%  | 0          | 0.00%   | 0          | 0.00%   | 9          | 64.29%  |
| sof-miR556d-3p  | 14       | A>G  | 0          | 0.00%   | 0          | 0.00%   | 19         | 25.68%  | 15         | 34.88%  | 0          | 0.00%   | 0          | 0.00%   |
| sof-miR556e-5p  | 6        | A>G  | 16         | 6.72%   | 6          | 2.41%   | 17         | 6.75%   | 24         | 6.33%   | 6          | 1.53%   | 0          | 0.00%   |
| sof-miR556e-5p  | 10       | G>T  | 8          | 3.36%   | 37         | 14.86%  | 17         | 6.75%   | 14         | 3.69%   | 42         | 10.71%  | 0          | 0.00%   |
| sof-miR556e-5p  | 11       | A>T  | 93         | 39.08%  | 48         | 19.28%  | 45         | 17.86%  | 131        | 34.56%  | 113        | 28.33%  | 25         | 33.78%  |
| sof-miR556e-5p  | 12       | C>T  | 7          | 2.94%   | 17         | 6.72%   | 11         | 4.28%   | 6          | 1.62%   | 0          | 0.00%   | 24         | 0.00%   |
| sof-miRND01-5p  | 5        | G>A  | 69         | 98.57%  | 97         | 100.00% | 46         | 100.00% | 60         | 100.00% | 40         | 93.02%  | 28         | 96.55%  |
| sof-miRND03-5p  | 8        | G>A  | 129        | 100.00% | 0          | 0.00%   | 0          | 0.00%   | 0          | 0.00%   | 0          | 0.00%   | 0          | 0.00%   |
| sof-miRND03-5p  | 12       | C>A  | 31         | 33.33%  | 27         | 61.36%  | 15         | 83.33%  | 12         | 66.67%  | 20         | 90.91%  | 0          | 0.00%   |
| sof-miRND04-3p  | 18       | A>G  | 9          | 42.86%  | 7          | 36.84%  | 12         | 57.14%  | 12         | 46.15%  | 13         | 37.14%  | 9          | 69.23%  |
| sof-miRND05-5p  | 16       | G>A  | 55         | 94.83%  | 39         | 100.00% | 45         | 88.24%  | 58         | 100.00% | 28         | 100.00% | 29         | 96.67%  |
| sof-miRND07-5p  | 5        | A>G  | 5          | 2.44%   | 0          | 0.00%   | 19         | 4.97%   | 12         | 3.68%   | 7          | 1.51%   | 0          | 0.00%   |
| sof-miRND07-5p  | 9        | G>T  | 34         | 16.59%  | 156        | 36.11%  | 64         | 16.75%  | 31         | 9.51%   | 124        | 26.78%  | 9          | 12.33%  |
| sof-miRND07-5p  | 10       | A>T  | 0          | 0.00%   | 15         | 3.47%   | 9          | 2.56%   | 9          | 2.76%   | 0          | 0.00%   | 0          | 0.00%   |
| sof-miRND07-5p  | 11       | C>T  | 0          | 0.00%   | 9          | 2.08%   | 8          | 2.09%   | 20         | 6.14%   | 22         | 4.75%   | 7          | 9.59%   |
| sof-miRND08-3p  | 11       | A>T  | 11         | 100.00% | 5          | 62.50%  | 9          | 100.00% | 0          | 0.00%   | 0          | 0.00%   | 0          | 0.00%   |
| sof-miRND09-5p  | 6        | T>C  | 57         | 98.28%  | 66         | 86.84%  | 51         | 100.00% | 92         | 93.88%  | 65         | 97.01%  | 58         | 98.31%  |
| sof-miRND10-5p  | 5        | G>A  | 9          | 13.64%  | 25         | 24.75%  | 26         | 13.13%  | 13         | 7.69%   | 21         | 18.58%  | 5          | 15.15%  |
| sof-miRND14-3p  | 9        | A>G  | 0          | 0.00%   | 146        | 97.33%  | 802        | 90.83%  | 338        | 88.02%  | 412        | 84.43%  | 321        | 98.47%  |
| sof-miRND20-3p  | 15       | G>T  | 73         | 70.19%  | 23         | 69.70%  | 82         | 89.13%  | 98         | 73.68%  | 93         | 83.78%  | 239        | 80.74%  |
| sof-miRND27-5p  | 9        | G>T  | 27         | 25.47%  | 123        | 45.52%  | 52         | 26.80%  | 17         | 13.08%  | 89         | 38.70%  | 5          | 18.52%  |
| sof-miRND27-5p  | 10       | A>T  | 0          | 0.00%   | 15         | 5.60%   | 9          | 4.64%   | 9          | 6.92%   | 0          | 0.00%   | 0          | 0.00%   |
| sof-miRND28-3p  | 10       | T>C  | 0          | 0.00%   | 0          | 0.00%   | 12         | 13.19%  | 0          | 0.00%   | 0          | 0.00%   | 0          | 0.00%   |
| sof-miRND30-5p  | 9        | T>C  | 0          | 0.00%   | 0          | 0.00%   | 0          | 0.00%   | 12         | 80.00%  | 0          | 0.00%   | 0          | 0.00%   |
| sof-miRND33-5p  | 16       | C>T  | 7          | 58.33%  | 0          | 0.00%   | 5          | 100.00% | 11         | 57.89%  | 6          | 100.00% | 6          | 54.55%  |
| sof-miRND37-5p  | 5        | G>C  | 0          | 0.00%   | 11         | 15.28%  | 25         | 1.43%   | 0          | 0.00%   | 0          | 0.00%   | 0          | 0.00%   |
| sof-miRND37-5p  | 5        | T>C  | 0          | 0.00%   | 16         | 22.22%  | 60         | 17.19%  | 0          | 0.00%   | 8          | 10.53%  | 0          | 0.00%   |
| sof-miRND37-5p  | 9        | C>T  | 0          | 0.00%   | 0          | 0.00%   | 35         | 10.03%  | 0          | 0.00%   | 9          | 11.84%  | 0          | 0.00%   |
| sof-miRND37-5p  | 10       | C>T  | 0          | 0.00%   | 0          | 0.00%   | 7          | 2.01%   | 16         | 18.18%  | 5          | 6.58%   | 0          | 0.00%   |
| sof-miRND37-5p  | 12       | A>G  | 20         | 26.32%  | 0          | 0.00%   | 16         | 4.58%   | 7          | 7.95%   | 10         | 13.16%  | 37         | 50.68%  |
| sof-miRND39-3p  | 5        | T>C  | 0          | 0.00%   | 0          | 0.00%   | 10         | 50.00%  | 0          | 0.00%   | 14         | 45.16%  | 0          | 0.00%   |
| sof-miRND39-3p  | 17       | A>G  | 14         | 93.33%  | 9          | 90.00%  | 10         | 50.00%  | 8          | 100.00% | 17         | 54.84%  | 7          | 100.00% |
| sof-miRND51-5p  | 13       | T>A  | 0          | 0.00%   | 0          | 0.00%   | 83         | 71.5%   | 0          | 0.00%   | 0          | 0.00%   | 0          | 0.00%   |
| sof-miRND78-3p  | 13       | G>A  | 8          | 50.00%  | 10         | 76.92%  | 0          | 0.00%   | 20         | 83.33%  | 15         | 100.00% | 0          | 0.00%   |
| sof-miRND83-3p  | 8        | T>G  | 27         | 71.05%  | 32         | 72.73%  | 45         | 72.58%  | 23         | 79.31%  | 42         | 93.33%  | 11         | 91.67%  |
| sof-miRND92-3p  | 8        | G>A  | 14         | 35.00%  | 7          | 25.93%  | 0          | 0.00%   | 6          | 25.00%  | 13         | 29.55%  | 9          | 22.50%  |
| sof-miRND95-5p  | 16       | T>A  | 12         | 85.71%  | 0          | 0.00%   | 25         | 80.65%  | 21         | 80.77%  | 13         | 81.25%  | 23         | 85.19%  |
| sof-miRND97-5p  | 9        | T>C  | 0          | 0.00%   | 0          | 0.00%   | 0          | 0.00%   | 0          | 0.00%   | 13         | 12.62%  | 0          | 0.00%   |
| sof-miRND99-5p  | 5        | C>T  | 25         | 12.5%   | 9          | 6.25%   | 23         | 7.08%   | 14         | 6.64%   | 42         | 16.34%  | 10         | 10.53%  |
| sof-miRND99-5p  | 15       | G>A  | 10         | 5.03%   | 7          | 4.90%   | 15         | 4.62%   | 0          | 0.00%   | 7          | 0.00%   | 0          | 0.00%   |
| sof-miRND108-3p | 8        | C>T  | 14         | 16.28%  | 16         | 47.06%  | 7          | 6.48%   | 13         | 23.12%  | 14         | 20.90%  | 14         | 23.33%  |
| sof-miRND108-3p | 9        | C>T  | 11         | 12.79%  | 7          | 20.59%  | 24         | 22.22%  | 5          | 8.93%   | 15         | 22.99%  | 9          | 15.00%  |
| sof-miRND108-3p | 12       | G>A  | 18         | 20.93%  | 0          | 0.00%   | 7          | 6.48%   | 14         | 25.00%  | 11         | 16.42%  | 5          | 8.33%   |
| sof-miRND109-5p | 7        | G>A  | 100        | 54.95%  | 67         | 58.77%  | 58         | 50.43%  | 141        | 55.29%  | 117        | 60.62%  | 26         | 59.09%  |
| sof-miRND109-5p | 12       | T>A  | 9          | 4.95%   | 0          | 0.00%   | 0          | 0.00%   | 14         | 5.49%   | 0          | 0.00%   | 0          | 0.00%   |
| sof-miRND109-5p | 17       | T>C  | 39         | 21.43%  | 29         | 25.4%   | 41         | 35.65%  | 39         | 13.3%   | 29         | 14.3%   | 14         | 33.33%  |
| sof-miRND113-3p | 6        | T>C  | 66         | 78.57%  | 44         | 95.65%  | 373        | 94.91%  | 136        | 95.77%  | 122        | 87.14%  | 92         | 84.6%   |
| sof-miRND115-5p | 16       | C>T  | 15         | 11.45%  | 15         | 15.31%  | 62         | 22.79%  | 7          | 7.87%   | 21         | 15.56%  | 31         | 25.97%  |
| sof-miRND145-3p | 18       | C>T  | 14         | 46.67%  | 0          | 0.00%   | 0          | 0.00%   | 0          | 0.00%   | 5          | 4.46%   | 0          | 0.00%   |
| sof-miRND154-5p | 7        | G>A  | 39         | 25.49%  | 12         | 11.01%  | 10         | 3.23%   | 5          | 3.40%   | 29         | 12.73%  | 11         | 8.03%   |
| sof-miRND155-5p | 7        | G>A  | 39         | 25.49%  | 12         | 11.01%  | 10         | 3.23%   | 5          | 3.40%   | 29         | 12.73%  | 11         | 8.03%   |
| sof-miRND158-3p | 16       | A>G  | 12         | 100.00% | 0          | 0.00%   | 6          | 100.00% | 6          | 85.71%  | 7          | 100.00% | 14         | 100.00% |
| sof-miRND158-3p | 14       | G>A  | 0          | 0.00%   | 0          | 0.00%   | 0          | 0.00%   | 256        | 100.00% | 0          | 0.00%   | 0          | 0.00%   |
| sof-miRND173-5p | 9        | A>G  | 17         | 100.00% | 11         | 100.00% | 26         | 100.00% | 5          | 100.00% | 0          | 0.00%   | 10         | 100.00% |
| sof-miRND177-5p | 5        | A>G  | 0          | 0.00%   | 14         | 7.14%   | 13         | 12.50%  | 0          | 0.00%   | 0          | 0.00%   | 0          | 0.00%   |
| sof-miRND177-5p | 19       | C>T  | 49         | 76.56%  | 148        | 75.51%  | 59         | 56.73%  | 58         | 76.32%  | 60         | 89.55%  | 112        | 96.55%  |
| sof-miRND184-3p | 10       | G>A  | 0          | 0.00%   | 13         | 7.18%   | 15         | 3.47%   | 0          | 0.00%   | 0          | 0.00%   | 0          | 0.00%   |
| sof-miRND192-3p | 7        | T>A  | 0          | 0.00%   | 0          | 0.00%   | 15         | 68.18%  | 0          | 0.00%   | 0          | 0.00%   | 0          | 0.00%   |
| sof-miRND192-3p | 11       | C>T  | 0          | 0.00%   | 0          | 0.00%   | 0          | 0.00%   | 12         | 70.59%  | 0          | 0.00%   | 0          | 0.00%   |
| sof-miRND196-3p | 12       | C>T  | 0          | 0.00%   | 22         | 75.86%  | 12         | 42.86%  | 9          | 56.25%  | 10         | 52.63%  | 12         | 40.00%  |
| sof-miRND201-3p | 13       | A>G  | 17         | 6.61%   | 19         | 5.04%   | 24         | 3.80%   |            |         |            |         |            |         |

|                |    |     |      |         |      |         |      |         |     |         |      |         |      |         |
|----------------|----|-----|------|---------|------|---------|------|---------|-----|---------|------|---------|------|---------|
| sof-miRN371-3p | 8  | C>A | 49   | 98.00%  | 29   | 82.86%  | 20   | 71.43%  | 111 | 100.00% | 50   | 90.91%  | 25   | 100.00% |
| sof-miRN379-3p | 17 | C>T | 0    | 0       | 0    | 0       | 142  | 9.02%   | 0   | 0       | 0    | 0       | 0    | 0       |
| sof-miRN391-3p | 14 | A>C | 9    | 75.00%  | 8    | 72.73%  | 0    | 0       | 12  | 80.00%  | 7    | 87.50%  | 7    | 58.33%  |
| sof-miRN392-3p | 13 | G>A | 0    | 0       | 0    | 0       | 0    | 0       | 14  | 100.00% | 0    | 0       | 0    | 0       |
| sof-miRN396-3p | 6  | C>T | 2249 | 53.02%  | 2364 | 58.18%  | 5713 | 69.58%  | 958 | 29.12%  | 1281 | 33.65%  | 1567 | 47.64%  |
| sof-miRN396-3p | 7  | G>A | 275  | 6.48%   | 249  | 6.13%   | 443  | 5.38%   | 319 | 9.70%   | 245  | 6.44%   | 196  | 5.96%   |
| sof-miRN396-3p | 11 | C>A | 70   | 1.65%   | 41   | 1.01%   | 32   | 0.39%   | 89  | 2.71%   | 69   | 1.81%   | 100  | 3.04%   |
| sof-miRN396-3p | 13 | T>A | 64   | 1.51%   | 29   | 0.71%   | 78   | 0.95%   | 58  | 1.76%   | 110  | 2.89%   | 22   | 0.67%   |
| sof-miRN396-3p | 16 | G>A | 210  | 4.95%   | 207  | 5.09%   | 543  | 6.59%   | 204 | 6.20%   | 121  | 3.18%   | 120  | 3.65%   |
| sof-miRN401-3p | 15 | A>G | 0    | 0       | 0    | 0       | 18   | 100.00% | 0   | 0       | 6    | 66.67%  | 18   | 100.00% |
| sof-miRN402-3p | 4  | C>T | 18   | 81.82%  | 0    | 0       | 0    | 0       | 0   | 0       | 0    | 0       | 0    | 0       |
| sof-miRN405-3p | 8  | G>A | 12   | 38.71%  | 0    | 0       | 8    | 26.67%  | 8   | 10.67%  | 7    | 14.00%  | 0    | 0       |
| sof-miRN405-3p | 19 | G>A | 0    | 0       | 0    | 0       | 0    | 0       | 13  | 17.33%  | 0    | 0       | 0    | 0       |
| sof-miRN406-3p | 9  | G>C | 11   | 91.67%  | 9    | 69.23%  | 0    | 0       | 11  | 45.83%  | 0    | 0       | 7    | 77.78%  |
| sof-miRN407-3p | 15 | A>T | 9    | 100.00% | 9    | 100.00% | 24   | 100.00% | 0   | 0       | 14   | 100.00% | 0    | 0       |

**Table S4. RT primers, forward and reverse primers for cDNA synthesis and RT-qPCR.**

| Target            | RT primer                                                | forward primer           | reverse primer           |
|-------------------|----------------------------------------------------------|--------------------------|--------------------------|
| sof-miR159-3p     | GTCGTATCCAGTGCGTGTCGGAGTCGGCAATTGCACTGGATACGACAG<br>GCGA | TTCGGGTACCATTCTGAT<br>C  | TGCGTGTCGTGGAGTCG        |
| sof-miR166a-3p    | GTCGTATCCAGTGCGTGTCGGAGTCGGCAATTGCACTGGATACGACGG<br>GGAA | TCGGACCAGGCTTCATTC       |                          |
| sof-miR396a-5p    | GTCGTATCCAGTGCGTGTCGGAGTCGGCAATTGCACTGGATACGACCA<br>GTTC | TCCACAGGCTTTCTTGAA<br>C  |                          |
| sof-5564b-3p      | GTCGTATCCAGTGCGTGTCGGAGTCGGCAATTGCACTGGATACGACGG<br>AGGA | AGCTGTTGACGAATTCC<br>T   |                          |
| sof-miR5564b V-3p | GTCGTATCCAGTGCGTGTCGGAGTCGGCAATTGCACTGGATACGACGG<br>AATT | TccagctgttcgTcgaatt      |                          |
| actin             |                                                          | TACGTTGCGATTCAAGCC<br>GT | CCAAACGAAGAATGGCAT<br>GG |

Fig. S1

A

### CLUSTAL 2.1 MULTIPLE SEQUENCE ALIGNMENT OF MIR156

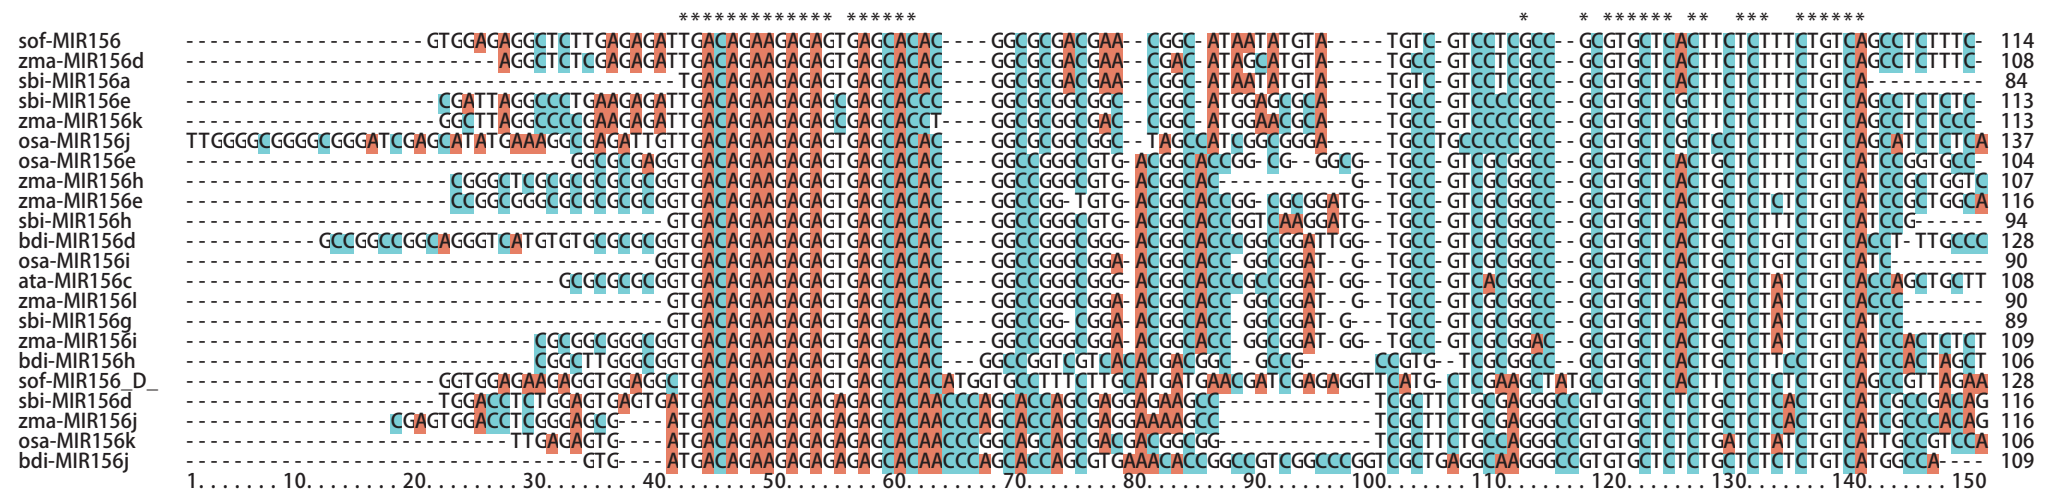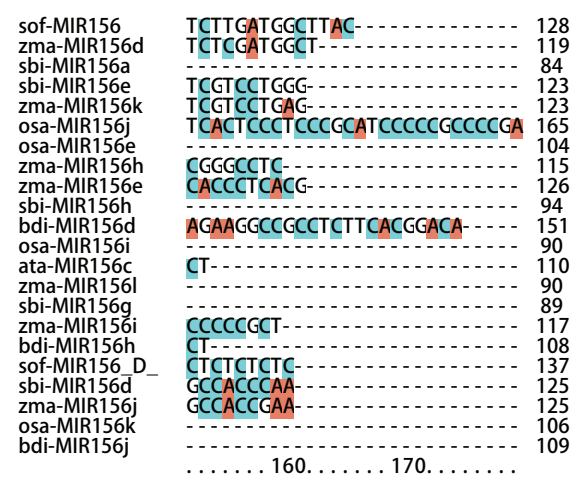



### CLUSTAL 2.1 MULTIPLE SEQUENCE ALIGNMENT OF MIR166

```

sbi-MIR166g -----TCATGCTCGGATTAGGTTAGGGGGATTGTTGTCTGGCTCGGGGTCTCCGGTCCGAGA-----AT-----CCT-TGGCCCT---TGCCGGAG-----TTGT-CGTTGACCCGAGATTTCGGACCAAGGCT 106
sof-MIR166g -----ATGCTCGGATTAGGTTAGGGGGATTGTTGTCTGGCTCGGGGTCTCCGGTCCGAGATCGATTGATA-TATAT-----CTTCTGGCCCT-TTGGCCGGAG-----TTGT-CGCCGACGGGAGATTTCGGACCAAGGCT 120
zma-MIR166k -----GCATGCTCGGTTAGGTTAGGGGGATTGTTGTCTGGCTCGGGGTCTCCGGTCCGAGATCGATTGATACATATACGTACGTGTTCTAGCCCTTGCCGGCGGAG-TAGTCTGTTGT-CGTCCGACCCGAGATTTCGGACCAAGGCT 140
zma-MIR166n -----GGGATTGTTGTCTGGCTCGGTGTCTCCGGTCCGAGAYGG-----CCTTGCCGG---CGCCGGAG-----CTGT-CGTCCGACCCGAGATTTCGGACCAAGGCT 86
bdi-MIR166h -----TAGGTTAAGGGGTTTGTGTCTGGCTCGGGGCTCCGGTCTTGTATCGATGCGCCGAC-----TCCATCTCCCTTCCACGGGGAGACGTGCGTTGCGTACGTTGACCCGGGATCTCGACCAAGGCT 119
osa-MIR166k -----ATTAGGTTAAGGGGTTTGTGTCTGGCTCGAGGCATCCGG-----GACTC-CGGT-----TTCTCCTTTCCT-ACTGGAGCCCTAATTTCCG--GCAGCTCCGAGCCTCGGACCAAGGCT 108
bdi-MIR166j -----GATTGAGGCGTCGGACCAAGGCTTCACTCCTTGTAAACCATGATCCA-TGGCGTCTACATACACATAGATGTAGGTTTCTGTGTAGTTAATCGCGTGGCA-----TGCCAGGATTAGGTTAAGGGGTTTGTGTCTGGC 135
sbi-MIR166b -----GGGGAATGATGT-----CGGGTCCGAAAGC-GCTGTGG--GCGAAAGCAGCCGGTGGCGGCTTCGGACCAAGGCT 63
sof-MIR166d -----AGCTTCAATGGCTGTCCGAGGGGAATGATGT-----CCGGTCCGAAAGAT-GCTGTGG--GCGAAAGCAGCCGGTGGCGGCTTCGGACCAAGGCT 86
osa-MIR166j -----TGATCCATGGCTGTTGAGAGGAATGACGT-----CCGGTCTGAAGATCGCCGTCC---CCA---GGCGGTGG-----CCTCGGACCAAGGCT 75
zma-MIR166f -----GGGGAATGACGT-----CCGGTCCGAAACAAGCCAGGGT---GCTGCTGGCTACCCGGC-CGGCTTCGGACCAAGGCT 69
zma-MIR166h -----GGGGAATGACGT-----CCGGTCCGAAACAAGCCAGGGT---GCTGCTGGCCGCCCGCG--GGCTTCGGACCAAGGCT 67
ssp-MIR166 -----AGCTATTGCTTCTGAGTGAATGTTGTCTGGTTCAAGGTCTCGCTTGC-GATTTAAGGATGAT-----TCGTGCATGGCATGTGTAGTTTTT---ATTCCITGAATCTGT--GGGATCTCGGACCAAGGCT 120
sof-MIR166e -----TGGAATGTTGTCTGGTTCAAGGTCTCGCTTGC-GATTTAAGGATGAT-----TCGTGCATGGCATGTGTAGTTTTT---ATTCCITGAATCTGT--GGGATCTCGGACCAAGGCT 103
sbi-MIR166a -----GTGAATGTTGTCTGGTTCAAGGTCTCGCTTGT-GATTTAAGGATGAT-----TTGTGCATG---CGTAATTTTT---ATTCCITGAATCTAT--GAGATCTCGGACCAAGGCT 99
zma-MIR166b -----GTGAATGTTGTCTGGTTCAAGGTCTTGTCTGATCCGATTGAGGATGAT-----CCATGCTTG-CATGTGTAGTTTTTTT-TGTTCCCTCAGATCTAC--AAGATCTCGGACCAAGGCT 107
zma-MIR166d -----GTGAATGTTGTCTGGTTCAAGGCTT--TTG--TTTG--TGAT-----CCATCTGTG---TAGAGTTTAAAGTATTCCITGGATCTGC--AAGATCTCGGACCAAGGCT 95
sbi-MIR166j -----TGTGAATGTTGTCTGGTTCTAGCCCTCTCTA-CATCAA-GCA-----TGG-----ATGTAGTACAGCCCTACTGCAATTGTTGCT--GGGACCTCGGACCAAGGCT 96
sof-MIR166a -----AGGAAGCCATTGCTGTGTGGAATGTTGTCTGGTTCTAGCCCTCTATCTG--TGAGAGGATGCA-----TGGTCTCTC---ATGAGCAGCAGCCCTACTGCAA-TTGCT--GGGACCTCGGACCAAGGCT 120
ata-MIR166d -----CGTTTTGAGGGGAATGTTGTCTGGCTCGGGCT-----CTCTTTCTTT-CT---CTCT--CTCTATCCTCCTCCCTCGACCCC---TCC---76
bdi-MIR166b GCTAGAGAGGGAGCCTTTTTCGTTTTGAGGGGAATGTTGTCTGGCTCGGGCT-----CTCTTTAATTT-CTCTCTCTT---TGTATCTTCTTTTCTCGATCTC---CTAG--C 104
osa-MIR166b -----GGGAGCCTTTTCAATTTGAGGGGAATGTTGTCTGGCTCGGGCTA-----CTTTTAAATTT-CTCTCTCTT---TGTATCTTCTTTTCTCGATCTC---CTAG--C 93
sbi-MIR166h -----AGGGGAATGTTGTCTGGCTCGGGGCG-----CCGCCGCTCCGCTCCGCTCT---TCTTCTCTGGTCTCTCT-CTCTC---CC---73
zma-MIR166a -----TGAGGGGAATGTTGTCTGGCTCGGGGCG-----CCGCCG---CGCTCT---TCTTCTCTAGTCTCTCTCTCTC---CTAGCAG 74
sof-MIR166f -----GAGCCTTTTCTGCTTTGAGGGGAATGTTGTCTGGCTCGGGGCG-----CCGCCGCTC---GGTCTCT---TCTCTCTGTGTCTCGCCATCTC---TC---86
sof-MIR166b -----TTGAGGGGAATGTTGTCTGGCTCGAGG-----TGAGAA-----ACATGCA-GGTTGTTGTTGATCTCGGACCAAGGCT 67
sof-MIR166c -----GTTGAGGGGAATGTTGTCTGGTCCGAGACCTA-----ACACCGCCGGATCCAATGGAGCA---GCATGCATGGTGGTGGTGGTTTCGGACCAAGGCT 87
1. .... 10. .... 20. .... 30. .... 40. .... 50. .... 60. .... 70. .... 80. .... 90. .... 100. .... 110. .... 120. .... 130. .... 140. .... 150

```

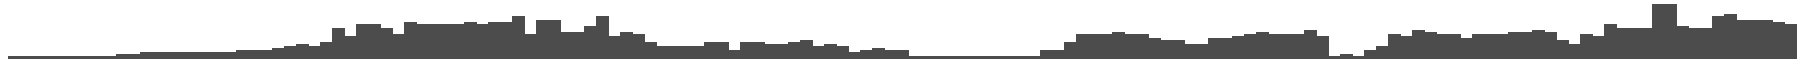



D

### CLUSTAL 2.1 MULTIPLE SEQUENCE ALIGNMENT OF MIR167

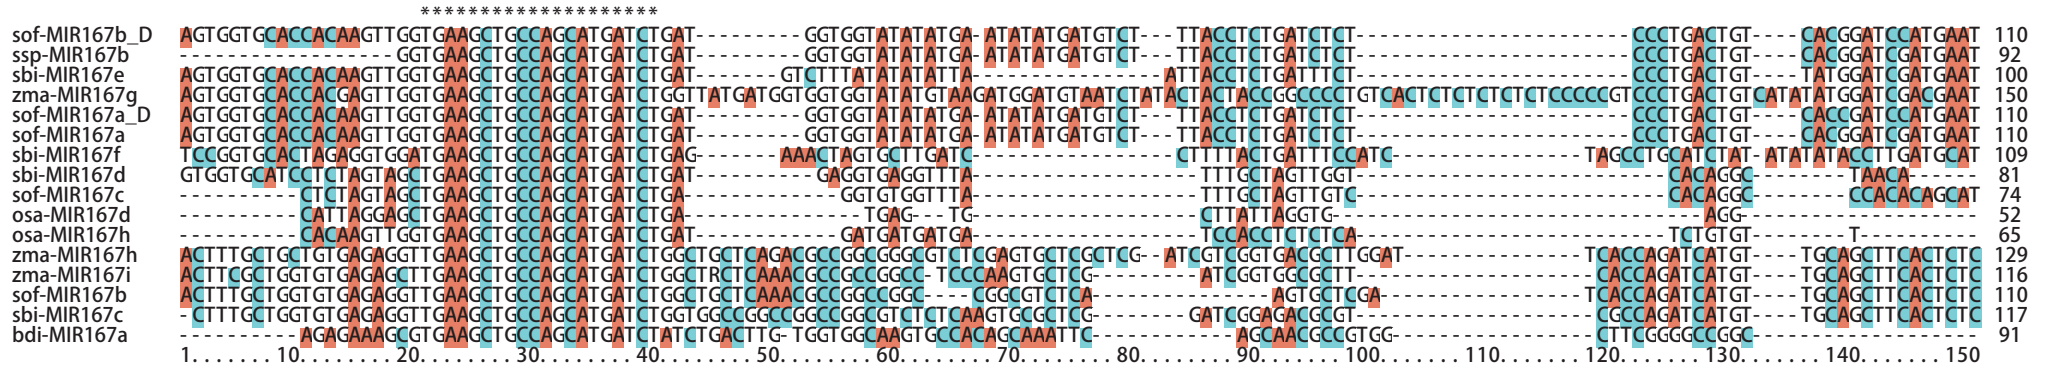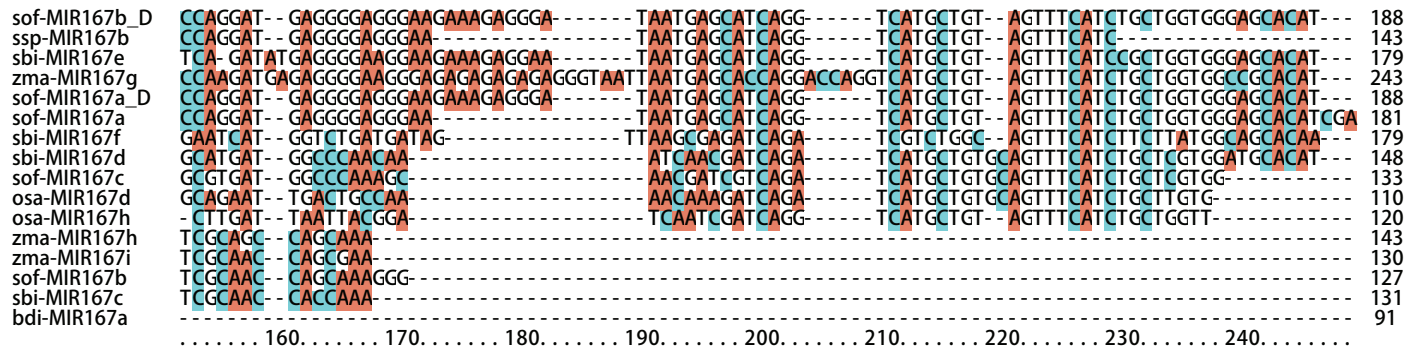

### CLUSTAL 2.1 MULTIPLE SEQUENCE ALIGNMENT OF MIR171

```

* ***          ***
zma-MIR171c ----- GGGGAATCGAAACCTACGGGATATTGGTGC GGTTCAATCAGAAA --- GCTTGGCTCCAAA ----- GCCCAG- GGG ----- CTCCACT----- CTTT- GACTGAGCCGTGCCAATAT 98
sof-MIR171d ----- TAAACCTACGGGATATTGGCGCGGTTCAATCAGAAA --- GCTTGGCTCCAAA ----- GCCCAG- GGG ----- CTCCACT----- CTTT- GATTGAGCCGTGCCAATAT 89
sbi-MIR171k ----- CGGGATATTGGCGCGGTTCAATCAGAAA --- GCTTGGCTCCAAA ----- GCCCAG- GGG ----- CTCCACT----- CTTT- GATTGAGCCGTGCCAATAT 81
osa-MIR171c ----- GTGGGAAACGGGATATTGGTGC GGTTCAATCAGAAA --- GCTTGTGCTCCGAA ----- GCCGAG- GGG ----- CTCCACT----- CTTT- GATTGAGCCGTGCCAATAT 88
zma-MIR171b ----- CGGGATATTGGCGCGGTTCAATCAGAAA --- GCTTGGCTCCAGG ----- CCCCAG- GGG ----- CTCCACT----- CTTT- GATTGAGCCGTGCCAATAT 81
osa-MIR171b ----- GCGACGACGGGATATTGGGCGGTTCAATCAGAAA --- GCTTGTGCTCCGGA ----- AGCGAG- GAG ----- CTCTACT----- CTTTGTAGCCGTGCCAATAT 89
sbi-MIR171b ----- ATGGC- CGCCGCGCGGACGGGATTGGCGCGGTTCAATTGAGAG --- GCTCGAGCCCTAGAC ----- TAGACCCCAAGGAGAGAG- GGGG ----- CTCTGCT----- CTCT- GATTGAGCCGTGCCAATAT 112
zma-MIR171j ----- AATGGC- CGC- GAGCTAGACGGGATTGACCGGTTCAATTGAGAG --- GCTCGAGCCCTAG ----- CAGAGCCCAAGGGGGGTG- GGG ----- CTCTGCT----- CTCT- GATTGAGCCGTGCCAATAT 109
TGGGTGCAACGCAATGGCCCGACGGGATTGGCGCGGTTCAATTGAGAG --- GCTCGAGCCCTAGA ----- TCGGGGCCAGCCACTGGG- GGG ----- CTCTGCT----- CTCT- GATTGAGCCGTGCCAATAT 117
osa-MIR171i ----- TAAAAAGAGATTGGCGTGCCTCAATCCGAAG --- GCATGGCTGATTACAGGC ----- ACCTCGACCGATCTAGCCATGCAG ----- CCATGTT----- TCTTGGATTGAGCCGCGTCAATAT 107
zma-MIR171l ----- GTATTGGCGTGCCTCAATCCGAAG --- GCGTGGCTGA ----- CTGGCCG- GCAG ----- CCATGTT----- CTTGGATTGAGCCGCGTCAATAT 76
zma-MIR171m ----- GTATTGGCGCGCTCAATCCGAAG --- GCGTGGCTGAT ----- AGATTGGCCG- GCAG ----- CCATGTT----- CTTGGATTGAGCCGCGTCAATAT 80
sof-MIR171f ----- TGCTAGCCGCTAGGACGGGAGGGATTGGTGC CGCTCAATCCGAAG --- GCGTGGCTGAT ----- TGCCG- ACAG ----- CCATGTT----- CTTGGATTGAGCCGCGTCAATAT 101
sbi-MIR171h ----- GGTATTGGCGCGCTCAATCCGAAG --- GCGTGGCTGAT ----- TTGCCATG- GCAG ----- CCATGTT----- CTTGGATTGAGCCGCGTCAATAT 78
sbi-MIR171d ----- AT AATGGAATAGT AGCTATGATGTTGGCTCGGCTCACTCAGACC --- ACCTCTCCGATCCTCAGCTGCTGTCCATTGC GACATCGATCATGTATATATGT ----- CGCTGGTCTGGTTTCTGATTGAGCCGTGCCAATAT 133
sof-MIR171a ----- T AATGGAATAGT AGCTATGATGTTGGCTCGGCTCACTCAGACC --- ACCTCGT----- TGTCCATTGC GCGGAGATCATGTATGC- CGC ----- CGCTGGT----- GTTTCTGATTGAGCCGTGCCAATAT 113
zma-MIR171e ----- AGAAATGGAATAGT AGCTATGATGTTGGCTCGGCTCACTCAGACC --- ACCTA ----- CGCCGCGAGATCATGTGC- TATGC ----- CGCTGCT----- GTTTCTGATTGAGCCGTGCCAATAT 106
sbi-MIR171a ----- TTGGTTGGCTGAGAGAGTGC GATGTTGGCATGGTCAATCAAATCATCGCCGGCAAGGTGACTTAAATTTTGGCTTTTCTGA- TCGATCGAGGTGCAGGGAAGGTGTTCCAGGCACC GTGTTGATTGAGCCGTGCCAATAT 141
sof-MIR171b ----- GAGAGAGTGC GATGTTGGCATGGTCAATCAAATC --- GCGCGCCGGGTGACTTAA- TTTTGGCTTTCTA- TCGGTGAGAGTGTAG ----- TTTCCAGC ----- GTTGTGATTGAGCCGTGCCAATAT 115
zma-MIR171f ----- TTGGTTGTTGGCTGAGAGAGTGC GATGTTGGCATGGTCAATCAAATCGCCGGCCG- GGGTGGCTTATAGCTTAAATCTGGCATTCTGATCGAGGTGCGGG ----- CGCATGTTTAAATTGATTGAGCCGTGCCAATAT 134
zma-MIR171i ----- CTGGTTGGCTGAGAGAGTGC GATGTTGGCATGGTCAATCAAATCGCCGGCCG- GGTTGACTTGT ----- ATGCAT- GAAGGTGAAT ----- CCCCAGGGACT----- GATTGAGCCGCGCCAATAT 102
sbi-MIR171j ----- GCGAGCGATATTGGTAGGTTCAATCAGATC --- AT- CAGATGATGATTT- TAAATTTAC ----- ATGCAT- GAAGGTGTGA ----- ATCCAGTGTCT----- GATTGAGCCGCGCCAATAT 98
zma-MIR171a ----- GATATTGGCGAGGTTCAATCAGATG --- ATGATTTTTCTTATATA- TAAATTTGC ----- ATGCAT- GAAGGTGTGA ----- ATCCAGTGTCT----- GATTGAGCCGCGCCAATAT 98
smo-MIR171a ----- CGAGCGAGAGCGATATTGGCTCTGCTCAATCGCATG --- ACCGTGCTGCATCGCACGAAAAATTTGGCATGGGAATGGATCGATGGAGTCG ----- CAGCAGAGGCAT----- GAGATTGAGCCGTGCCAATAT 121
bdi-MIR171f ----- ACGACATGGCATGGTATTGTTTCCGCTCATGTCCITCT- CGA ----- GCTGATGG- TC- GGATG ----- AGATGTGAGCCGAACCAATAT 77
zma-MIR171h ----- GGGAGGAAGGAGACGACATGGCTGGTATTGTTTCCGCTCATGTCCITCTTCTGATCGAGTCTT ----- GCCGTTGGATTT- GGATG ----- TGATGTGAGCCGAACCAATAT 101
sbi-MIR171e ----- AGGAGGAAGGAGACGACATGGCTGGTATTGTTTCCGCTCATGTCCITCTTCTGATCGAGTCTT ----- GTCGTGGATTTTGGATG ----- TGATGTGAGCCGAACCAATAT 101
zma-MIR171k ----- GGGAGGAAGGAGACGACATGGCTGGTATTGTTTCCGCTCATGTCCITCTTCTGACT ----- GGATG ----- TGATGTGAGCCGAACCAATAT 81
sof-MIR171c ----- GGAGGAAGATGACGACATGGCTGGTATTGTTTCCGCTCATGTCCITCTTCTGAGTCTT ----- GTCGTTGGACTT- GGACT ----- GGATGTGAGCCGAACCAATAT 99
osa-MIR171h ----- AGAAGAAGAGGACATGGTTGGTATTGTTTCCGCTCATG ----- TCGTTAC ----- ACAGA ----- TG ----- TGAGCCGAACCAATAT 70
sbi-MIR171f ----- TGA GAGAATAAGACGACATGGCTGGTATTGTTTCCGCTCATGCATATCCTTCTT- GAGTGT ----- ATCATCAGG ----- AAAGA ----- GCGCATGAGCCGAACCAATAT 96
zma-MIR171c ----- AGAACGAGACGACATGGCATGGTATTGACTTGGCTCATCTCTCATCCACAGCAAACTT ----- CACA- AGTGCCTGAGG ----- TGAGCCGAGCCCAATAT 89
sbi-MIR171g ----- AGAACGAGGCGACATGGCATGGTATTGACTTGGCTCATCTCTCGCCACACCAGAATC ----- CACA- AGTGCCTGAGG ----- AG ----- TGAGCCGAGCCCAATAT 92
osa-MIR171g ----- GACATGGCATGGTATTGACTTGGCTCATCT- CAGCAACAGCAAACTG ----- CATGCACCGTGGAGG ----- TGAGCCGAGCCCAATAT 78
1. .... 10. .... 20. .... 30. .... 40. .... 50. .... 60. .... 70. .... 80. .... 90. .... 100. .... 110. .... 120. .... 130. .... 140. .... 150

```

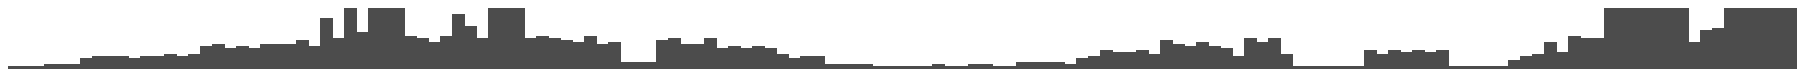

### CLUSTAL 2.1 MULTIPLE SEQUENCE ALIGNMENT OF MIR396

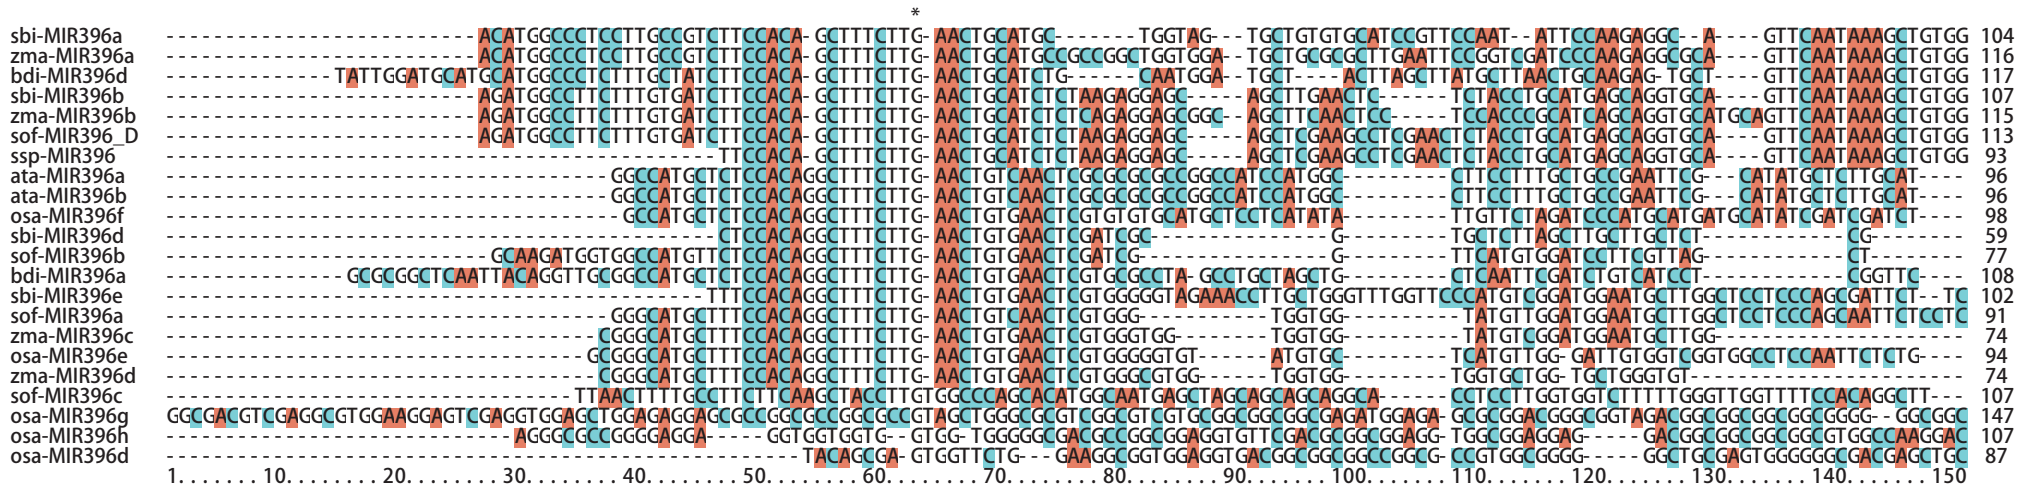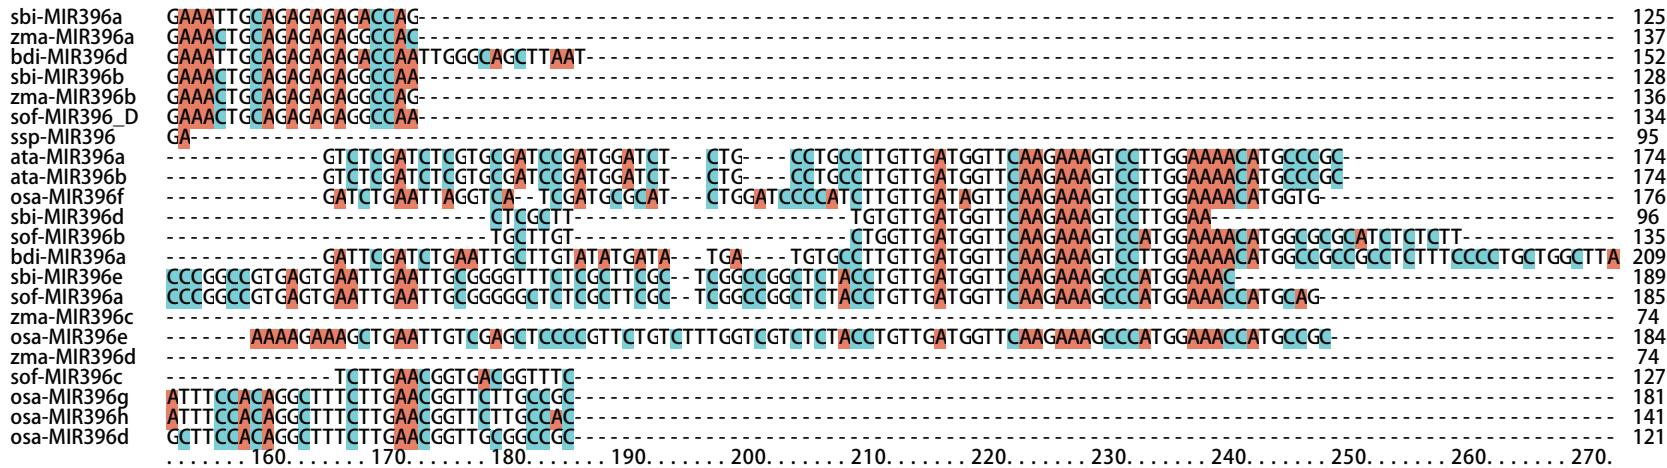

Supplement: 12864_2017_4053_MOESM2_ESM.pdf [file 12864_2017_4053_MOESM2_ESM.pdf]
